# Supplementary material for: Genetic, Phenotypic and Metabolic Diversity of Yeasts From Wheat Flag Leaves
Source: Frontiers journal article supplement (doi:10.3389/fpls.2022.908628), 2022-07-07
Supplement: Data_Sheet_1.PDF [file Data_Sheet_1.PDF]

## *Supplementary Material*

### *Genetic, phenotypic and metabolic diversity of yeasts from wheat flag leaves*

Linda Gouka<sup>1</sup>, Caroline Vogels<sup>1</sup>, Lars Hestbjerg Hansen<sup>2</sup>, Jos M. Raaijmakers<sup>1,3</sup>, Viviane Cordovez<sup>1\*</sup>

**\*Correspondence:** Viviane Cordovez, [v.cordovez@nioo.knaw.nl](mailto:v.cordovez@nioo.knaw.nl)

**Supplementary Figure 1. Phylogeny of 51 phyllosphere yeast isolates selected for the screening of different phenotypic and metabolic traits.** Phylogeny is based on D1/D2 domains of the large subunit of the 26S rRNA gene sequences compared to NCBI database. Neighbor Joining tree was constructed with MEGA, MUSCLE for alignment.

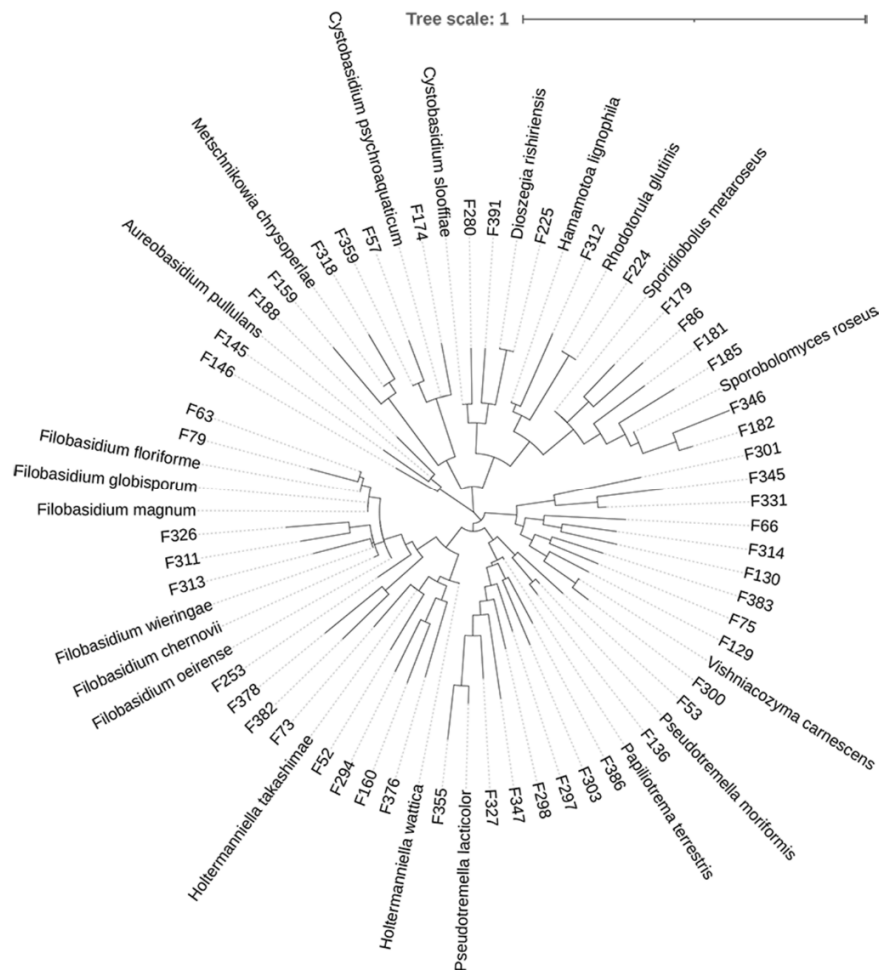

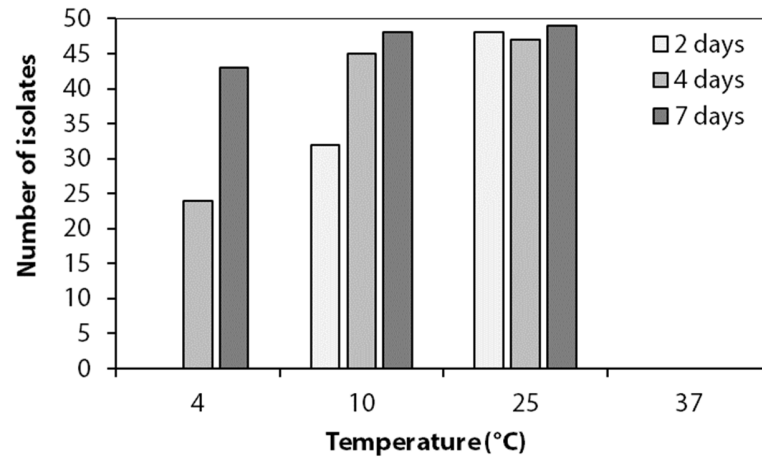

**Supplementary Figure 2. Growth of phyllosphere yeasts at different temperatures.** Bars represent the number of phyllosphere yeasts able to grow in the different temperature range. Additional information can be found in Supplementary Table S3.

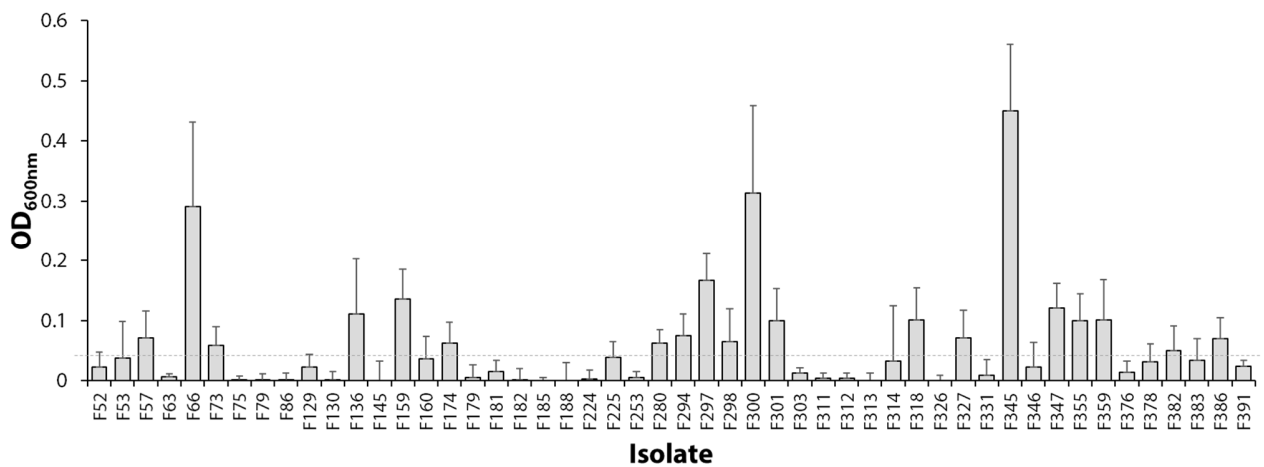

**Supplementary Figure 3. Biofilm formation by phyllosphere yeasts.** Optical density (OD<sub>600nm</sub>) of cells in biofilm was determined after 7 days. Bars present the standard deviation of the means of 4 replicates and at least 2 independent experiments. Isolates displaying an optical density higher than 0.05 were considered to form biofilm.
