# Supplementary material for: Genetic, Phenotypic and Metabolic Diversity of Yeasts From Wheat Flag Leaves
Source: Front Plant Sci. 2022 Jul 7;13:908628. doi: 10.3389/fpls.2022.908628 (PMC9301128; doi:10.3389/fpls.2022.908628)
Supplement: Supplementary file 2 [file Table_1.XLSX]

## Sheet: Yeast isolates
Supplementary Table S1. Taxonomy of the 175 yeasts isolated from wheat flag leaves and the type strains used for the phylogenetic tree.
Isolate			Closest BLAST hit (NCBI)
ID	Target	Primer	Species	Length (bp)	Identity (%)	Accession
F52	ITS	ITS1	Holtermanniella takashimae	1048	99.22	NR_137721.1
	LSU	LRO5	Holtermanniella wattica	903	98.45	NG_058307.1
F53	ITS	ITS1	Pseudotremella lacticolor	852	87.39	NR_158875.1
	LSU	LRO5	Pseudotremella lacticolor	850	94.11	NG_058379.1
F54	ITS	ITS1	Vishniacozyma tephrensis	468	96.59	NR_144812.1
F55	ITS	ITS1	Vishniacozyma tephrensis	1041	96.72	NR_144812.1
F56	ITS	ITS1	Vishniacozyma tephrensis	458	97.1	NR_144812.1
F57	ITS	ITS1	Aureobasidium namibiae	1109	97.39	NR_147362.1
	LSU	LRO5	Aureobasidium leucospermi	870	97.92	NG_058566.1
F58	ITS	ITS1	Aureobasidium namibiae	990	99.04	NR_147362.1
F59	ITS	ITS1	Aureobasidium namibiae	1045	98.12	NR_147362.1
F61	ITS	ITS1	Vishniacozyma carnescens	978	97.66	NR_130695.1
F63	ITS	ITS1	Aureobasidium melanogenum	1099	97.57	NR_159598.1
	LSU	LRO5	Filobasidium oeirense	488	99.79	NG_070508.1
F66	ITS	ITS1	Vishniacozyma carnescens	455	96.69	NR_130695.1
	LSU	LRO5	Vishniacozyma carnescens	1432	96.59	NG_058430.1
F67	ITS	ITS1	Aureobasidium namibiae	1020	98.68	NR_147362.1
F68	ITS	ITS1	Vishniacozyma tephrensis	470	98.3	NR_144812.1
F73	ITS	ITS1	Holtermanniella festucosa	515	99.42	NR_155179.1
	LSU	LRO5	Holtermanniella wattica	1219	96.68	NG_058307.1
F74	ITS	ITS1	Aureobasidium namibiae	1071	98.32	NR_147362.1
F75	ITS	ITS1	Vishniacozyma victoriae	999	98.15	NR_073260.1
	LSU	LRO5	Vishniacozyma carnescens	925	97.81	NG_058430.1
F76	ITS	ITS1	Holtermanniella festucosa	1014	95.98	NR_155179.1
F78	ITS	ITS1	Holtermanniella festucosa	1050	99.05	NR_155179.1
F79	ITS	ITS1	Filobasidium magnum	565	99.1	NR_130655.1
	LR05	LR05	Filobasidium magnum	900	99.33	NG_069409.1
F80	ITS	ITS1	Papiliotrema flavescens	472	99.33	NR_130696.1
F81	ITS	ITS1	Aureobasidium namibiae	1005	98.5	NR_147362.1
F82	ITS	ITS1	Vishniacozyma victoriae	471	99.54	NR_073260.1
F83	ITS	ITS1	Aureobasidium namibiae	1110	98.47	NR_147362.1
F84	ITS	ITS1	Aureobasidium namibiae	1082	98.49	NR_147362.1
F85	ITS	ITS1	Sporobolomyces roseus	755	98.92	NR_155845.1
F86	ITS	ITS1	Sporobolomyces roseus	547	98.35	NR_155845.1
	LR05	LR05	Sporidiobolus metaroseus	878	99.89	NG_069415.1
F87	ITS	ITS1	Sporidiobolus metaroseus	520	98.84	NR_137686.1
F88	ITS	ITS1	Sporobolomyces roseus	547	99.45	NR_155845.1
F89	ITS	ITS1	Sporobolomyces roseus	548	99.45	NR_155845.1
F90	ITS	ITS1	Sporobolomyces roseus	549	99.45	NR_155845.1
F125	ITS	ITS1	Vishniacozyma victoriae	798	96.91	NR_073260.1
F126	ITS	ITS1	Holtermanniella festucosa	514	100	NR_155179.1
F129	ITS	ITS1	Vishniacozyma victoriae	464	97.62	NR_073260.1
	LSU	LRO5	Vishniacozyma carnescens	933	98.57	NG_058430.1
F130	ITS	ITS1	Vishniacozyma victoriae	467	100	NR_073260.1
	LSU	LRO5	Vishniacozyma carnescens	896	98.77	NG_058430.1
F136	ITS	ITS1	Pseudotremella moriformis	1049	86.53	NR_155685.1
	LSU	LRO5	Pseudotremella moriformis	942	96.84	NG_058379.1
F137	ITS	ITS1	Papiliotrema flavescens	953	98.33	NR_130696.1
F140	ITS	ITS1	Papiliotrema flavescens	465	99.32	NR_130696.1
F145	ITS	ITS1	Sporobolomyces roseus	1004	99.1	NR_155845.1
	LR05	LR05	Diozegia rishiriensis	895	98.55	NG_059156.1
F146	ITS	ITS1	Dioszegia hungarica	427	99.77	NR_073227.1
	LSU	LRO5	Diozegia rishiriensis	1096	95.96	NG_059156.1
F147	ITS	ITS1	Vishniacozyma tephrensis	458	98.25	NR_144812.1
F148	ITS	ITS1	Vishniacozyma tephrensis	459	98.26	NR_144812.1
F149	ITS	ITS1	Vishniacozyma tephrensis	460	98.26	NR_144812.1
F150	ITS	ITS1	Vishniacozyma victoriae	443	100	NR_073260.1
F151	ITS	ITS1	Filobasidium oeirense	579	100	NR_077106.1
F152	ITS	ITS1	Vishniacozyma tephrensis	469	98.29	NR_144812.1
F153	ITS	ITS1	Vishniacozyma tephrensis	955	94.85	NR_144812.1
F154	ITS	ITS1	Vishniacozyma tephrensis	944	94.44	NR_144812.1
F155	ITS	ITS1	Vishniacozyma victoriae	466	99.36	NR_073260.1
F156	ITS	ITS1	Vishniacozyma tephrensis	464	98.06	NR_144812.1
F157	ITS	ITS1	Sporobolomyces roseus	550	99.45	NR_155845.1
F158	ITS	ITS1	Sporobolomyces roseus	552	99.27	NR_155845.1
F159	ITS	ITS1	Metschnikowia pulcherrima	350	93	NR_164379.1
	LSU	LRO5	Metschnikowia chrysoperlae	831	96.96	NG_058336.1
F160	ITS	ITS1	Holtermanniella festucosa	387	99.74	NR_155179.1
	LSU	LRO5	Holtermanniella wattica	1315	94.27	NG_058307.1
F162	ITS	ITS1	Aureobasidium melanogenum	982	98.33	NR_159598.1
F163	ITS	ITS1	Vishniacozyma tephrensis	469	96.6	NR_144812.1
F164	ITS	ITS1	Vishniacozyma tephrensis	951	95.33	NR_144812.1
F165	ITS	ITS1	Vishniacozyma victoriae	1000	96.2	NR_073260.1
F166	ITS	ITS1	Vishniacozyma tephrensis	466	96.79	NR_144812.1
F167	ITS	ITS1	Papiliotrema flavescens	465	99.32	NR_130696.1
F169	ITS	ITS1	Holtermanniella festucosa	512	99.41	NR_155179.1
F171	ITS	ITS1	Vishniacozyma tephrensis	1054	95.4	NR_144812.1
F172	ITS	ITS1	Aureobasidium namibiae	1094	98.32	NR_159598.1
F173	ITS	ITS1	Aureobasidium namibiae	1105	98.49	NR_147362.1
F174	ITS	ITS1	Aureobasidium namibiae	1081	98.49	NR_147362.1
	LSU	LRO5	Aureobasidium leucospermi	909	97.95	NG_058566.1
F175	ITS	ITS1	Aureobasidium namibiae	1111	99.04	NR_147362.1
F179	ITS	ITS1	Sporobolomyces roseus	555	98.37	NR_155845.1
	LSU	LRO5	Sporidiobolus metaroseus	899	99.66	NG_069415.1
F180	ITS	ITS1	Sporobolomyces roseus	1081	98.92	NR_155845.1
F181	ITS	ITS1	Sporobolomyces roseus	551	99.63	NR_155845.1
	LSU	LRO5	Sporidiobolus metaroseus	939	99.66	NG_069415.1
F182	ITS	ITS1	Sporobolomyces roseus	539	99.63	NR_155845.1
	LSU	LRO5	Sporidiobolus metaroseus	562	96.47	NG_069415.1
F183	ITS	ITS1	Sporobolomyces roseus	542	98.52	NR_155845.1
F184	ITS	ITS1	Sporobolomyces roseus	556	98.55	NR_155845.1
F185	ITS	ITS1	Sporobolomyces roseus	994	98.24	NR_155845.1
	LSU	LRO5	Sporidiobolus metaroseus	1023	98.43	NG_069415.1
F186	ITS	ITS1	Sporobolomyces roseus	549	99.63	NR_155845.1
F187	ITS	ITS1	Sporobolomyces roseus	539	99.63	NR_155845.1
F188	ITS	ITS1	Sporobolomyces roseus	952	99.1	NR_155845.1
	LSU	LRO5	Dioszegia rishiriensis	1201	98.47	NG_059156.1
F189	ITS	ITS1	Sporobolomyces roseus	822	98.57	NR_155845.1
F190	ITS	ITS1	Sporobolomyces roseus	1165	98.19	NR_155845.1
F224	ITS	ITS1	Rhodotorula babjevae	557	100	NR_077096.1
	LSU	LRO5	Rhodotorula glutinis	869	99.77	NG_055728.1
F225	ITS	ITS1	Cystobasidium slooffiae	518	97.43	NR_103568.1
	LSU	LRO5	Cystobasidium slooffiae	901	99.78	NG_059008.1
F226	ITS	ITS1	Sporobolomyces roseus	551	98.36	NR_155845.1
F228	ITS	ITS1	Sporobolomyces roseus	546	99.45	NR_155845.1
F229	ITS	ITS1	Sporobolomyces roseus	546	99.45	NR_155845.1
F230	ITS	ITS1	Sporobolomyces roseus	540	99.63	NR_155845.1
F231	ITS	ITS1	Sporobolomyces roseus	555	98.37	NR_155845.1
F232	ITS	ITS1	Sporobolomyces roseus	547	99.45	NR_155845.1
F233	ITS	ITS1	Sporobolomyces roseus	531	99.62	NR_155845.1
F234	ITS	ITS1	Sporobolomyces roseus	679	97.75	NR_155845.1
F235	ITS	ITS1	Sporobolomyces roseus	552	99.64	NR_155845.1
F236	ITS	ITS1	Vishniacozyma victoriae	456	99.34	NR_073260.1
F237	ITS	ITS1	Vishniacozyma victoriae	1004	99.38	NR_073260.1
F239	ITS	ITS1	Vishniacozyma victoriae	465	99.54	NR_073260.1
F241	ITS	ITS1	Vishniacozyma tephrensis	465	96.57	NR_144812.1
F245	ITS	ITS1	Filobasidium stepposum	484	99.79	NR_111207.1
F246	ITS	ITS1	Aureobasidium melanogenum	528	98.29	NR_159598.1
F249	ITS	ITS1	Holtermanniella takashimae	502	98.99	NR_137721.1
F250	ITS	ITS1	Vishniacozyma victoriae	459	99.54	NR_073260.1
F253	ITS	ITS1	Filobasidium chernovii	1276	98.82	NR_073223.1
	LSU	LRO5	Filobasidium globisporum	1235	99.45	NG_070553.1
F254	ITS	ITS1	Filobasidium chernovii	571	99.48	NR_073223.1
F268	ITS	ITS1	Pseudozyma flocculosa	624	91.45	NR_154663.1
F272	ITS	ITS1	Sporobolomyces roseus	965	98.38	NR_155845.1
F273	ITS	ITS1	Sporobolomyces roseus	1065	98.92	NR_155845.1
F274	ITS	ITS1	Sporobolomyces roseus	547	99.45	NR_155845.1
F275	ITS	ITS1	Sporobolomyces roseus	929	98.74	NR_155845.1
F276	ITS	ITS1	Sporobolomyces roseus	594	97.56	NR_155845.1
F277	ITS	ITS1	Sporobolomyces roseus	526	99.62	NR_155845.1
F278	ITS	ITS1	Sporobolomyces roseus	550	99.63	NR_155845.1
F279	ITS	ITS1	Sporobolomyces roseus	547	99.63	NR_155845.1
F280	ITS	ITS1	Cystobasidium psychroaquaticum	516	99.77	NR_171727.1
	LSU	LRO5	Cystobasidium psychroaquaticum	1177	98.3	NG_059007.1
F282	ITS	ITS1	Aureobasidium melanogenum	896	98.5	NR_159598.1
F283	ITS	ITS1	Aureobasidium namibiae	1105	98.49	NR_147362.1
F284	ITS	ITS1	Aureobasidium namibiae	1126	98.66	NR_147362.1
F286	ITS	ITS1	Aureobasidium melanogenum	1074	98.5	NR_159598.1
F287	ITS	ITS1	Aureobasidium melanogenum	855	98.5	NR_159598.1
F288	ITS	ITS1	Aureobasidium namibiae	1105	99.04	NR_147362.1
F291	ITS	ITS1	Aureobasidium melanogenum	789	98.32	NR_159598.1
F293	ITS	ITS1	Aureobasidium namibiae	889	98.85	NR_147362.1
F294	ITS	ITS1	Holtermanniella festucosa	514	99.41	NR_155179.1
	LSU	LRO5	Holtermanniella takashimae	677	95.33	NG_060626.1
F295	ITS	ITS1	Vishniacozyma tephrensis	469	96.6	NR_144812.1
F296	ITS	ITS1	Vishniacozyma victoriae	485	97.66	NR_073260.1
F297	ITS	ITS1	Papiliotrema flavescens	972	99.14	NR_130696.1
	LSU	LRO5	Papiliotrema terrestris	1247	96.81	NG_058367.1
F298	ITS	ITS1	Papiliotrema flavescens	975	98.53	NR_130696.1
	LSU	LRO5	Papiliotrema terrestris	1242	97.15	NG_058367.1
F299	ITS	ITS1	Filobasidium chernovii	951	98.21	NR_073223.1
F300	ITS	ITS1	Vishniacozyma tephrensis	1007	93.15	NR_144812.1
	LSU	LRO5	Vishniacozyma carnescens	934	99.01	NG_058430.1
F301	ITS	ITS1	Papiliotrema flavescens	457	99.08	NR_130696.1
	LSU	LRO5	Vishniacozyma carnescens	1238	98	NG_058430.1
F302	ITS	ITS1	Vishniacozyma victoriae	442	100	NR_073260.1
F303	ITS	ITS1	Vishniacozyma victoriae	467	99.54	NR_073260.1
	LSU	LRO5	Papiliotrema terrestris	1500	96.6	NG_058367.1
F304	ITS	ITS1	Papiliotrema flavescens	437	99.29	NR_130696.1
F305	ITS	ITS1	Papiliotrema flavescens	471	99.33	NR_130696.1
F306	ITS	ITS1	Papiliotrema flavescens	467	99.1	NR_130696.1
F307	ITS	ITS1	Vishniacozyma tephrensis	467	96.58	NR_144812.1
F308	ITS	ITS1	Papiliotrema flavescens	456	99.31	NR_130696.1
F309	ITS	ITS1	Vishniacozyma victoriae	459	97.33	NR_144812.1
F310	ITS	ITS1	Vishniacozyma victoriae	456	99.34	NR_073260.1
F311	ITS	ITS1	Filobasidium chernovii	563	99.29	NR_073223.1
	LSU	LRO5	Filobasidium globisporum	1207	99.01	NG_070553.1
F312	ITS	ITS1	Pseudohyphozyma pustula	1352	83.16	NR_073288.1
	LSU	LRO5	Hamamotoa lignophila	1235	93.74	NG_070402.1
F313	ITS	ITS1	Filobasidium chernovii	981	98.84	NR_073223.1
	LSU	LRO5	Filobasidium globisporum	1227	98.46	NG_070553.1
F314	ITS	ITS1	Vishniacozyma tephrensis	441	98.41	NR_144812.1
	LSU	LRO5	Vishniacozyma carnescens	895	97.99	NG_058430.1
F315	ITS	ITS1	Filobasidium chernovii	571	99.48	NR_073223.1
F316	ITS	ITS1	Holtermanniella takashimae	492	100	NR_137721.1
F317	ITS	ITS1	Papiliotrema flavescens	965	98.13	NR_130696.1
F318	ITS	ITS1	Metschnikowia pulcherrima	678	94.63	NR_164379.1
	LSU	LRO5	Metschnikowia chrysoperlae	829	96.04	NG_058336.1
F325	ITS	ITS1	Filobasidium oeirense	1086	98.67	NR_077106.1
F326	ITS	ITS1	Filobasidium chernovii	1117	99.17	NR_073223.1
	LSU	LRO5	Filobasidium globisporum	1286	98.31	NG_070553.1
F327	ITS	ITS1	Papiliotrema flavescens	996	98.31	NR_130696.1
	LSU	LRO5	Papiliotrema terrestris	1116	98.17	NG_058367.1
F328	ITS	ITS1	Filobasidium chernovii	1267	99.15	NR_073223.1
F329	ITS	ITS1	Holtermanniella festucosa	329	99.81	NR_155179.1
F330	ITS	ITS1	Vishniacozyma tephrensis	456	98.25	NR_144812.1
F331	ITS	ITS1	Vishniacozyma carnescens	910	97.93	NR_130695.1
	LSU	LRO5	Vishniacozyma carnescens	563	97.51	NG_058430.1
F332	ITS	ITS1	Vishniacozyma tephrensis	468	96.59	NR_144812.1
F334	ITS	ITS1	Anthracocystis grodzinskae	1022	91.01	NR_154694.1
F342	ITS	ITS1	Aureobasidium namibiae	910	97.28	NR_159598.1
F343	ITS	ITS1	Aureobasidium namibiae	821	99.04	NR_147362.1
F344	ITS	ITS1	Aureobasidium melanogenum	506	98.41	NR_159598.1
F345	ITS	ITS1	Vishniacozyma tephrensis	940	93.95	NR_144812.1
	LSU	LRO5	Vishniacozyma victoriae	924	97.31	NG_057678.1
F346	ITS	ITS1	Sporobolomyces roseus	550	99.45	NR_155845.1
	LSU	LRO5	Sporidiobolus metaroseus	872	97.9	NG_069415.1
F347	ITS	ITS1	Papiliotrema flavescens	959	98.12	NR_130696.1
	LSU	LRO5	Papiliotrema terrestris	1159	97.7	NG_058367.1
F353	ITS	ITS1	Sporobolomyces roseus	930	98.39	NR_155845.1
F354	ITS	ITS1	Filobasidium chernovii	602	99.32	NR_073223.1
F355	ITS	ITS1	Papiliotrema flavescens	472	99.33	NR_130696.1
	LSU	LRO5	Papiliotrema terrestris	1037	96.22	NG_058367.1
F357	ITS	ITS1	Sporobolomyces roseus	1043	98.4	NR_155845.1
F359	ITS	ITS1	Aureobasidium namibiae	895	99.04	NR_147362.1
	LSU	LRO5	Aureobasidium pullulans	389	99.48	NG_055734.1
F360	ITS	ITS1	Sporobolomyces roseus	540	99.63	NR_155845.1
F362	ITS	ITS1	Aureobasidium melanogenum	790	98.5	NR_159598.1
F363	ITS	ITS1	Holtermanniella festucosa	513	99.8	NR_155179.1
F364	ITS	ITS1	Sporobolomyces roseus	540	98.51	NR_155845.1
F366	ITS	ITS1	Vishniacozyma tephrensis	459	97.33	NR_144812.1
F375	ITS	ITS1	Vishniacozyma tephrensis	462	97.11	NR_144812.1
F376	ITS	ITS1	Holtermanniella festucosa	513	99.8	NR_155179.1
	LSU	LRO5	Holtermanniella wattica	842	96.73	NG_058307.1
F378	ITS	ITS1	Filobasidium wieringae	1245	83.18	NR_077105.1
	LSU	LRO5	Filobasidium magnum	968	95.87	NG_069409.1
F379	ITS	ITS1	Holtermanniella festucosa	513	99.41	NR_155179.1
F381	ITS	ITS1	Holtermanniella festucosa	1027	99.24	NR_155179.1
F382	ITS	ITS1	Filobasidium wieringae	1091	83.58	NR_077105.1
	LSU	LRO5	Filobasidium magnum	1206	95.13	NG_069409.1
F383	ITS	ITS1	Vishniacozyma victoriae	875	95.5	NR_073260.1
	LSU	LRO5	Vishniacozyma carnescens	1222	95.91	NG_058430.1
F386	ITS	ITS1	Papiliotrema flavescens	471	99.33	NR_130696.1
	LSU	LRO5	Papiliotrema terrestris	919	98.23	NG_058367.1
F391	ITS	ITS1	Cystobasidium slooffiae	528	97.54	NR_103568.1
	LSU	LRO5	Cystobasidium slooffiae	910	99.56	NG_059008.1

## Sheet: Type strains
Supplementary Table S1. Taxonomy of the 175 yeasts isolated from wheat flag leaves and the type strains used for the phylogenetic tree.
Species	Accession number
Aureobasidium pullulans	CBS 584.75
Metschnikowia chrysoperlae	CBS 9803
Cystobasidium psychroaquaticum	CBS 11769
Cystobasidium slooffiae	CBS 5706
Dioszegia rishiriensis	CBS 11844
Hamamotoa lignophila	CBS 7109
Rhodotorula glutinis	CBS 20
Sporidiobolus metaroseus	CBS 7683
Sporobolomyces roseus	CBS 486
Vishniacozyma carnescens	CBS 973
Pseudotremella moriformis	CBS 7810
Papiliotrema terrestris	CBS 10810
Pseudotremella lacticolor	CBS 10915
Holtermanniella wattica	CBS 9496
Holtermanniella takashimae	CBS 11174
Filobasidium oeirense	CBS 8681
Filobasidium chernovii	CBS 8679
Filobasidium wieringae	CBS 1937
Filobasidium magnum	CBS 140
Filobasidium globisporum	CBS 7642
Filobasidium floriforme	CBS 6241
