# Supplementary material for: Genetic, Phenotypic and Metabolic Diversity of Yeasts From Wheat Flag Leaves
Source: Front Plant Sci. 2022 Jul 7;13:908628. doi: 10.3389/fpls.2022.908628 (PMC9301128; doi:10.3389/fpls.2022.908628)
Supplement: Supplementary file 3 [file Table_2.XLSX]

## Sheet: Day 2
Supplementary Table S2. Average optical density (OD 590nm) of Biolog EcoPlates (n=3) measured after 2 days of incubation at 25°C.
Class	Compound	F52	F53	F57	F63	F66	F73	F75	F79	F86	F129	F130	F136	F145	F146	F159	F160	F174	F179	F181	F182	F185	F188	F224	F225	F253	F280	F294	F297	F298	F300	F301	F303	F311	F312	F313	F314	F318	F326	F327	F331	F345	F346	F347	F355	F359	F376	F378	F382
Miscellaneous	Pyruvic acid methyl ester	0.002	0.00466667	0.0246667	0	0.0466667	0.0326667	0.083	0.003	0.001	0.005	0.035	0.00733333	0.0263333	0	0	-0.000333333	0.017	0.000666667	0.00133333	0	0.00333333	0	0.00166667	0.0163333	0.00666667	0.00333333	0.004	0.00766667	0.00466667	0.0616667	0.01	0.00866667	0.00366667	0	0	0	0.0213333	0	0.00866667	0.0163333	0.256667	0.0183333	0.0136667	0.011	0.031	0	0.00233333	0.000333333
Polymer	Tween 40	0.0566667	0.0543333	0.0603333	0.0113333	0.043	0.0293333	0.133	0.00333333	0.00466667	0.00966667	0.0393333	0.0113333	0.0303333	0.00466667	0.0356667	0.015	0.0143333	0.005	0.00666667	0.00133333	0.0166667	0	0.00566667	0.034	0.00833333	0.00633333	0.0143333	0.00866667	0.01	0.0173333	0.012	0.00333333	0.00866667	0.00533333	0.0136667	0.0343333	0.021	0.00266667	0.053	0.0146667	0.121667	0.00166667	0.146	0.036	0.0513333	0	0.0156667	0.0193333
Polymer	Tween 80	0.00966667	0.017	0.0593333	0.00933333	0.0266667	0.0436667	0.128667	0.006	0.00633333	0.016	0.0306667	0.014	0.0226667	0.0236667	0.0183333	0.00833333	0.058	0.00833333	0.00833333	0.005	0.005	0	0.00733333	0.0656667	0.007	0.008	0.00966667	0.0163333	0.0163333	0.0196667	0.00966667	0.01	0.0146667	0.0173333	0.00133333	0.00566667	0.00633333	0	0.055	0.00333333	0.0376667	0.00633333	0.144667	0.0313333	0.135333	0	0.0126667	0.00466667
Polymer	α-Cyclodextrin	0.014	0.0186667	0.0146667	0.005	0.0253333	0.0206667	0.0323333	0.00466667	0.00566667	0.015	0.0346667	0.011	0.029	0.00866667	0.00266667	0.01	0.0126667	0.00433333	0.00433333	0.00166667	0.00433333	0	0.00433333	0.0156667	0.013	0.0126667	0.0133333	0.0163333	0.015	0.035	0.0226667	0.012	0.0196667	0.007	0.00166667	0.00666667	0.005	0.000666667	0.0193333	0.00733333	0.0253333	0.006	0.002	0.000333333	0.008	0.00933333	0.00433333	0.0186667
Polymer	Glycogen	0.008	0.014	0.106667	0.006	0.0283333	0.014	0.0543333	0.007	0.00866667	0.0253333	0.0693333	0.017	0.0613333	0.0153333	0	0.0126667	0.0543333	0.00766667	0.009	0.01	0.00766667	0.001	0.0103333	0.0236667	0.0123333	0.0103333	0.0116667	0.014	0.0103333	0.0353333	0.011	0.017	0.019	0.003	0	0.00233333	0.007	0	0.019	0.00633333	0.027	0.004	0.011	0.00433333	0.0456667	-0.000333333	0.021	0.0136667
Carbohydrate	D-Cellobiose	0.004	0.00766667	0.058	0.00133333	0.359333	0.025	0.223667	0.002	0.0233333	0.131333	0.0266667	0.00666667	0.0196667	0.0156667	0.315667	0.0376667	0.0246667	0.00166667	0.00366667	0.00166667	0.00133333	0	0.004	0.0236667	0.009	0.004	0.00833333	0.101	0.0203333	0.307333	0.167	0.223667	0.002	0.00233333	0	0	0.0413333	0	0.045	0.179667	0.459333	0.00266667	0	0	0.00166667	0	0	0
Carbohydrate	α-D-Lactose	0	0.002	0.006	-0.000333333	0.0796667	0	0.0246667	0.001	0.00166667	0.00233333	0.00766667	0.00233333	0.00833333	0	0	0.000666667	0.000333333	0.00166667	0.00166667	0.000666667	0.00166667	0	0.002	0.004	0.00433333	0.00166667	0.00333333	0.00366667	0.004	0.0903333	0.00866667	0.0776667	0.00133333	0.00233333	0	0	0.00233333	0	0.00966667	0.00666667	0.277333	0	0	0	0	0	0.00133333	0
Carbohydrate	β-Methyl-D-Glucoside	0.0123333	0.00466667	0.079	0.004	0.349667	0.015	0.241333	0.003	0.00333333	0.025	0.003	0.00333333	0.00233333	0.00733333	0.18	0.00866667	0.00766667	0.003	0.003	0.00266667	0.002	0	0.00233333	0.0123333	0.01	0.003	0.014	0.006	0.00533333	0.305	0.0173333	0.214333	0.014	0	0.00166667	0.023	0.031	0.013	0.019	0.249667	0.523667	0.000666667	0.00833333	0	0.238	0.0103333	0.0173333	0.00166667
Carbohydrate	D-Xylose	0.0386667	0.0273333	0.139333	0.0246667	0.258333	0.143333	0.195667	0.0226667	0.0263333	0.075	0.075	0.025	0.0696667	0.035	0.041	0.067	0.063	0.0226667	0.022	0.0233333	0.0226667	0.022	0.0243333	0.0816667	0.0436667	0.0253333	0.269667	0.055	0.044	0.256667	0.245	0.14	0.0543333	0.0376667	0.036	0.038	0.0633333	0.081	0.178333	0.283667	0.428333	0.0453333	0.027	0.113	0.169333	0.024	0.0716667	0.032
Carbohydrate	i-Erythritol	0.00466667	0.00566667	0.078	0.001	0.226667	0.001	0.156333	0.000666667	0.00133333	0.0586667	0.0436667	0.004	0.033	0.00633333	0	0.00466667	0.019	-0.000333333	0.001	0	-0.000333333	0	0.001	0.00833333	0.002	0.001	0.00166667	0.00566667	0.002	0.187667	0.0213333	0.121333	0.01	-0.000333333	0	0	0.00466667	0	0.0353333	0.236333	0.398	0.003	0.001	0	0.204333	0	0.00166667	0.00166667
Carbohydrate	D-Mannitol	0.00533333	0.00666667	0.05	0	0.293667	0.04	0.252333	0.003	0.000666667	0.018	0.0423333	0.00366667	0.0326667	0.006	0.238	0.0226667	0.042	0	0.00133333	0.000333333	0	0	0.00133333	0.0776667	0	-0.000333333	0.00866667	0.0313333	0.00366667	0.246333	0.208	0.0126667	0.007	0	0	0	0.138667	0	0.082	0.0183333	0.482667	0.003	0.200333	0.0213333	0.0546667	0	0.024	0
Carbohydrate	N-Acetyl-D-Glucosamine	0.014	0.013	0.0506667	0.00333333	0.23	0.110333	0.167667	0.00133333	0.007	0.039	0.0516667	0.00933333	0.0403333	0.000333333	0.411	0.0293333	0.0236667	0.000666667	0.001	0	0	0	0.00866667	0.0126667	0.0106667	0.009	0.0336667	0.00866667	0.008	0.208333	0.02	0.142333	0.0243333	0.009	0	0.000666667	0.066	0	0.0133333	0.0363333	0.377	0.01	0.000666667	0.00133333	0.0846667	0.00466667	0.00566667	0.0213333
Carboxylic acid	D-Glucosaminic-Acid	0.007	0.00666667	0.008	0.00733333	0.225	0.00333333	0.128	0.00666667	0.00666667	0.0123333	0.0463333	0.013	0.036	0.000666667	0	0.00233333	0	0.00333333	0.008	0	0.00133333	0	0.00466667	0.00933333	0.00833333	0.002	0.00133333	0.00866667	0.00366667	0.153333	0.007	0.0243333	0.00633333	0	0	0	0.006	0	0.00833333	0.0133333	0.384667	0.002	0	0	0	0	0.000333333	0
Miscellaneous	Glucose-1-Phosphate	0.000666667	0.00566667	0.00833333	0.000666667	0.0126667	0	0.0286667	0.000333333	0.00166667	0.00266667	0.0343333	0.00533333	0.027	0	0	0	0.00233333	0.00166667	0.001	0	0.000333333	0	0.000333333	0.00566667	0.004	0.005	0	0.00766667	0.00633333	0.008	0.015	0.005	0.00333333	0.00166667	0	0	-0.000333333	0	0.01	0.00366667	0.0206667	0.000666667	0	0	0	0	0	0
Miscellaneous	D,L-α-Glycerol Phosphate	-0.000333333	0.00133333	0.002	0	0	0.002	0.00633333	0.00133333	0.000666667	0.001	0.00733333	0.005	0.00666667	0	0	0	0	0	0	0.001	0.000666667	0	0.00166667	0.00133333	0.004	0.00133333	-0.000333333	0.00133333	0.00133333	0.003	0.00333333	0.000333333	0.00266667	0	0	0	0.000666667	0	0.00833333	0.00366667	0.018	0	0.001	0	0	0	0.000333333	0
Carboxylic acid	D-Galactonic Acid γ-Lactone	0.00333333	0.00133333	0.003	0	-0.000333333	0	0.00633333	0.001	0.001	0.000666667	0.000666667	0.000666667	0	0	0	0	0.001	0.00166667	0.000666667	0.000666667	0.000333333	0	0.00133333	0.004	0.00733333	0.000333333	0.00133333	0.00166667	0.00133333	0.00166667	0.001	0.000333333	0	0.00166667	0	0	0.00666667	0	0.00233333	0.00233333	0.022	0.001	0	0	0.003	0	0.000333333	0
Carboxylic acid	D-Galacturonic Acid	0.006	0.002	0.0426667	0.000333333	0.100333	0.0793333	0.125667	0.00166667	0.000333333	0.0103333	0.025	0.00533333	0.022	0	0	0.012	0.022	0.000333333	-0.000333333	-0.000333333	0	0	0.00166667	0.01	0.00433333	0.00133333	0.012	0.00366667	0.00833333	0.038	0.0183333	0.0146667	0.006	0	0	0.0206667	0.009	0	0.034	0.0713333	0.267667	0.00233333	0	0	0.071	0	0.0146667	0
Carboxylic acid	2-Hydroxy Benzoic Acid	0.00333333	0.00533333	0.0353333	0	0.015	0.001	0.00333333	0.000333333	0.000666667	0.005	0.0263333	0.00766667	0.0186667	0	0	-0.000333333	0.0163333	0.000333333	0	0	0	0	0.002	0.0156667	0.004	0.001	0	0.00166667	-0.000333333	0.00933333	0.025	0.007	0.004	0.00133333	0	0	0	0	0.015	0.0106667	0.05	0.00833333	0.00866667	0	0.0496667	0	0.00666667	0
Carboxylic acid	4-Hydroxy Benzoic Acid	0.00433333	0.00866667	0.0606667	-0.000333333	0.0136667	0.00533333	0.0223333	0.005	0	0.00366667	0.0326667	0.00166667	0.0246667	0	0	0.000666667	0.045	0.00366667	0.000333333	0	-0.000333333	0	0.00133333	0.0206667	0.004	0	0.000333333	0.003	0.001	0.01	0.015	0.00533333	0	0	0	0	0	0	0.02	0.00466667	0.044	0.00366667	0.016	0	0.105	0	0.0243333	0.00366667
Carboxylic acid	γ-Amino Butyric Acid	0.0106667	0.021	0.0236667	0.00366667	0.154667	0.0713333	0.157667	0.006	0.005	0.012	0.0323333	0.00733333	0.0243333	0.000333333	0	0.0293333	0.0116667	0.00233333	0.00666667	0	0.00566667	0	0.00533333	0.012	0.00733333	0.001	0.0193333	0.0333333	0.00833333	0.121	0.0653333	0.0506667	0.00966667	0.0143333	0	-0.000333333	0.00766667	0	0.0126667	0.0243333	0.345	0.0163333	0.0233333	0.00466667	0.0313333	0.00633333	0.00833333	0.0163333
Carboxylic acid	Itaconic Acid	0.00166667	0.012	0.00266667	0	0.0123333	0.00733333	0.0126667	0.003	0.00966667	0.00366667	0.029	0.008	0.021	0.001	0	0.00333333	0	0	0.00266667	0	0	0	0.00233333	0.0126667	0.0133333	0.00366667	0.00566667	0.001	0.005	0.015	0.0153333	0.00233333	0.00833333	0.000666667	0	0	0	0	0.00733333	0	0.006	0.00333333	0.00266667	0	0	0	0.012	0.00233333
Carboxylic acid	α-Keto Butyric Acid	0.00533333	0.00733333	0.00633333	0	0	0	0	0.004	0.00233333	0.00433333	0.0303333	0.0106667	0.023	0	0	0.002	-0.000333333	0	0.00433333	0	0	0	0.00266667	0.00233333	0.008	0.001	0.00233333	0.00333333	0.00366667	0.005	0.00266667	0	0.00466667	0.000666667	0	0.003	0.00366667	0	0.00333333	0	0	-0.000333333	0	0	0	0	-0.000333333	0
Carboxylic acid	D-Malic Acid	0.000666667	0.000333333	0.00433333	-0.000333333	0	0	0	0.00433333	0.000333333	0.000666667	0.00666667	0.00233333	0.000666667	0	0	0	0	0.002	0	0.000666667	0.00133333	0	0.00266667	0.002	0.000666667	0	0.000333333	0.000333333	0.00133333	0.000333333	0.00133333	0.00566667	0.00166667	0	0	0.001	0.00566667	0	0.0283333	0.00233333	0.0113333	0.00166667	0.0133333	0	0	0	-0.000333333	0
Amino acid	L-Arginine	0	0.00266667	0.00333333	-0.000333333	0.000666667	0	0.00766667	0.00233333	0.001	0.001	0	0.00333333	-0.000666667	0	-0.000333333	-0.000333333	0.00166667	0.002	0.00133333	0.001	-0.000333333	0	0.00133333	0.00233333	0.00333333	0.001	0.000666667	0.00166667	0.00333333	0.004	0.00233333	0.004	0	0.00133333	0	0	0.009	0	0.002	0.00433333	0.038	0.000333333	0	0	0.005	0	0	0
Amino acid	L-Asparagine	0.018	0.00166667	0.0163333	0.001	0.105333	0.0593333	0.0453333	0.00133333	0	0.000666667	0.0193333	0.006	0.0146667	0	0.054	0.000333333	0.012	0	0	0.00166667	0.000333333	0	0.00166667	0.00833333	0	0.000333333	0.0303333	0	0	0.076	0.000333333	0.00533333	0.0103333	0	0	0	0.008	-0.000333333	0.01	0.0196667	0.335667	0.00266667	0.000333333	0.00233333	0.0436667	0.00133333	0	0
Amino acid	L-Phenylalanine	0.000666667	0.00466667	0.004	-0.000333333	0.00566667	0	0	0.000666667	0.001	0.004	0.025	0.00566667	0.0176667	0	0	0	0	0.001	0.000333333	0.002	0.001	0	0.00266667	0.00733333	0	0.00333333	0	0.00733333	0.000333333	0.00933333	0	0.004	0	0	0	0	0.00733333	0	0.009	-0.000333333	0.0216667	0.00933333	0	0.002	0	0	0.00433333	0
Amino acid	L-Serine	0.000333333	0.00966667	0.00666667	0.00266667	0.046	0	-0.000333333	-0.000333333	0.00366667	0.004	0.029	0.00133333	0.0216667	0	0.052	0	0	0.002	-0.000333333	0	0	0	0.00133333	0.002	0.00466667	0	0.000666667	0.00333333	0.003	0.018	0.0123333	0.000333333	0.005	0	0	0	0.000666667	0	0.013	0.00533333	0.121333	0.00433333	0	0.00833333	0	0	0.003	0
Amino acid	L-Threonine	0.00433333	0.0106667	0.0153333	0.004	0.00766667	0.00933333	0.00266667	0.00566667	0.00433333	0.00566667	0.023	0.0116667	0.017	0	0.000333333	0.007	0	0	0.00666667	0.001	0.000666667	0	0.003	0.00833333	0.00966667	0.007	0.00333333	0.00733333	0.00933333	0.00866667	0.005	0.00966667	0.009	0.00733333	0	0.000333333	0	0	0.00633333	0.005	0.00633333	0.005	0	0.00466667	0	0.00166667	0.00433333	0.00366667
Amino acid	Glycyl-L-Glutamic Acid	0	0.004	0.007	0.002	0.0176667	0.00333333	0.0196667	0.00166667	0.00666667	0.00833333	0.0323333	0.0113333	0.0243333	0.003	0	0.00333333	0.000666667	0	0.00633333	0.001	-0.000333333	0	0.000333333	0.00633333	0.009	0.00166667	0.00266667	0.00533333	0.00233333	0.0136667	0.003	0.001	0.00633333	0	0	0	0.00133333	0	0.003	0	0.0486667	0	0	0	0	0	0.000666667	0
Amine/Amide	Phenylethyl-amine	0.000333333	0.004	0.00633333	0.002	0.001	0	0.009	0.003	0.00466667	0.003	0.0263333	0.0116667	0.0193333	0.00333333	0	0.008	0	0.00233333	0.00266667	0.001	0	0	0.003	0.004	0.007	0.00233333	0.00233333	0.00433333	0.000666667	0.000666667	0.012	0	0.00233333	0.00366667	0	0.00466667	0.00133333	0	0.012	0.000333333	0	0.000333333	0	0	0	0	0.00133333	0
Amine/Amide	Putrescine	0.00133333	0.001	0.005	0.001	0.0176667	0	0	0.00166667	0.001	0.00133333	0.005	0.00133333	0.00433333	0	0	0	0.004	0.00166667	0.00166667	0.000666667	0	0	0.00233333	0.002	0.00433333	0.002	0.00466667	0.00366667	0.003	0.00866667	0.009	0.002	0	0	0	0	0.00233333	0	0.0186667	0.014	0.146	0.000333333	0	0	0	0	0.000333333	0
[truncated: 4 more columns]

## Sheet: Day 4
Supplementary Table S2. Average optical density (OD 590nm) of Biolog EcoPlates (n=3) measured after 4 days of incubation at 25°C.
Class	Compound	F52	F53	F57	F63	F66	F73	F75	F79	F86	F129	F130	F136	F145	F146	F159	F160	F174	F179	F181	F182	F185	F188	F224	F225	F253	F280	F294	F297	F298	F300	F301	F303	F311	F312	F313	F314	F318	F326	F327	F331	F345	F346	F347	F355	F359	F376	F378	F382
Miscellaneous	Pyruvic acid methyl ester	0.00233333	0.00566667	0.0603333	0.00933333	0.224333	0.0833333	0.277667	0.0166667	0.00333333	0.0146667	0.025	0.008	-0.001	0.000666667	0.00166667	0.00266667	0.0513333	0.0106667	0.00266667	0.00266667	0.0113333	0	0.0103333	0.0126667	0	0.009	0.013	0.157667	0.0116667	0.313333	0.0206667	0.027	0	0	0	0	0.0363333	0	0.006	0	0.73	0.00366667	0.0793333	0.0403333	0.129333	0	0	0.00266667
Polymer	Tween 40	0.0393333	0.0203333	0.0736667	0.0263333	0.113667	0.134333	0.518667	0.0273333	0.178667	0.034	0.626333	0.019	0.0186667	0.00666667	0.177667	0.104667	0.098	0.247333	0.0153333	0.006	0.028	0	0.024	0.0296667	0.00233333	0.00833333	0.061	0.0243333	0.04	0.0683333	0.00733333	0.025	0.0176667	0.0203333	0	0.099	0.135	0.018	0.107	0.025	0.271667	0	0.0406667	0.076	0.0123333	0.0233333	0	0.00633333
Polymer	Tween 80	0.018	0.0183333	0.266	0.0193333	0.0996667	0.051	0.056	0.0293333	0.018	0.0403333	0.0386667	0.0156667	0.0126667	0.0163333	0.202	0.192667	0.360667	0.054	0.022	0.00966667	0.017	0	0.024	0.144333	0	0.00933333	0.013	0.019	0.0793333	0.0646667	0.0133333	0.0663333	0.004	0	0	0.0326667	0.103333	0.00133333	0.18	0	0.032	0	0	0.148	0	0.0713333	0	0.00466667
Polymer	α-Cyclodextrin	0.0196667	0.0263333	0.03	0.0293333	0.0393333	0.034	0.048	0.032	0.019	0.035	0.0153333	0.0193333	0.023	0.0153333	0.00466667	0.0246667	0.0363333	0.0233333	0.00433333	0.00666667	0.018	0	0.02	0.004	0.011	0.0196667	0.0226667	0.0223333	0.0353333	0.0423333	0.032	0.0293333	0.0353333	0.009	0	0.00733333	0	0.00333333	0.046	0	0	0.0343333	0.00166667	0.022	0.000333333	0.0176667	0	0.034
Polymer	Glycogen	0.0133333	0.0203333	0.496	0.0333333	0.0363333	0.024	0.0556667	0.036	0.0216667	0.0456667	0.053	0.0253333	0.0283333	0.0136667	0	0.028	0.236667	0.027	0.009	0.018	0.022	0	0.0246667	0	0.000666667	0.0123333	0.0216667	0.025	0.031	0.045	0.0163333	0.034	0.0916667	0.001	0	0	0	0	0.0223333	0	0	0.0373333	0.004	0.018	0.166667	0	0	0.022
Carbohydrate	D-Cellobiose	0.012	0.0133333	0.121667	0.0246667	0.724	0.143333	0.502333	0.0286667	0.0323333	0.365	0.251333	0.00833333	0.012	0.0773333	0.549667	0.353333	0.0756667	0.018	0.00166667	0.00366667	0.0136667	0	0.017	0.049	0.0466667	0.00466667	0.0396667	0.573667	0.0783333	0.661667	0.686667	0.524667	0.0996667	0.00666667	0	0.051	0.142333	0	0.239667	0.687333	0.812667	0.0333333	0.033	0.0266667	0.0566667	0.299	0	0.0263333
Carbohydrate	α-D-Lactose	-0.000333333	0.00166667	0.00433333	0.00366667	0.580333	0.002	0.014	0	0.00233333	0.00166667	0.286333	0.004	0.001	0	0.003	0.00466667	0.00366667	0.002	0.001	0.000666667	0.000666667	0	0.00233333	0	0.000333333	0.00133333	0.00466667	0.0226667	0.00666667	0.639667	0.035	0.604667	0.153333	0.004	0	0.0556667	0	0	0.015	0.11	0.75	0.0173333	0.026	0.00533333	0.00733333	0	0	0.0106667
Carbohydrate	β-Methyl-D-Glucoside	0.0366667	0.00366667	0.151333	0.00966667	0.734	0.0406667	0.726	0.00233333	0.00366667	0.237667	0.0353333	0.00333333	0	0.0166667	0.662667	0.0123333	0.0176667	0.00366667	0.000666667	0.003	0.00233333	0	0.00233333	0.002	0.0123333	0.003	0.026	0.00666667	0.00466667	0.687667	0.0223333	0.539667	0.103667	0	0.087	0.576333	0.0686667	0.198667	0.0373333	0.832667	0.738	0.0193333	0.0226667	0.011	0.682333	0.168	0.120667	0.093
Carbohydrate	D-Xylose	0.0836667	0.0296667	0.234333	0.0383333	0.410667	0.387667	0.408333	0.041	0.0286667	0.225333	0.134	0.0276667	0.0633333	0.0416667	0.0633333	0.241333	0.100667	0.037	0.0226667	0.0263333	0.0336667	0	0.033	0.298333	0.087	0.029	0.463333	0.361333	0.065	0.417333	0.731333	0.412	0.139	0.0333333	0	0.037	0.0666667	0.397667	0.816333	0.672333	0.613667	0.0423333	0.206333	0.637	0.380333	0.252	0.288	0.27
Carbohydrate	i-Erythritol	0.00466667	0.0123333	0.241	0.0263333	0.397333	0.0113333	0.423	0.0346667	0.008	0.222	0.290667	0.008	0.0196667	0.0146667	0	0.0226667	0.067	0.0216667	0.004	0.005	0.0186667	0	0.0196667	0	0	0.009	0.012	0.0176667	0.0236667	0.343	0.0323333	0.241667	0.003	0	0	0	0	0	0.0256667	0.405333	0.509	0.00333333	0.00433333	0.012	0.473333	0.016	0	0.00233333
Carbohydrate	D-Mannitol	0.00566667	0.0116667	0.169667	0.0246667	0.639333	0.306667	0.596667	0.042	0.0123333	0.131667	0.165667	0.007	0.011	0.00866667	0.462667	0.255333	0.198333	0.0313333	0.002	0.00433333	0.0176667	0	0.0233333	0.295	0	0.003	0.092	0.364333	0.0403333	0.578333	0.902667	0.0416667	0.017	0.00966667	0	0	0.218	0	0.774667	0.019	0.770667	0.00233333	0.683667	0.483	0.19	0.414333	0	0.019
Carbohydrate	N-Acetyl-D-Glucosamine	0.058	0.0246667	0.115	0.034	0.421333	0.375667	0.313333	0.0376667	0.021	0.172667	0.277333	0.0173333	0.025	0.005	0.995667	0.293667	0.129	0.026	0.000333333	0.006	0.0193333	0	0.03	0	0.005	0.0166667	0.264667	0.0173333	0.035	0.391667	0.0366667	0.270667	0.0203333	0.00866667	0	0	0.155333	0	0.00166667	0.476667	0.52	0.0286667	0.007	0.008	0.380667	0.177	0	0.025
Carboxylic acid	D-Glucosaminic-Acid	0.01	0.0153333	0.019	0.0366667	0.438	0.019	0.372667	0.0396667	0.022	0.054	0.0376667	0.016	0.0243333	0.011	0	0.021	0.017	0.026	0.00833333	0.00633333	0.0206667	0	0.0233333	0.0236667	0.00366667	0.005	0.0166667	0.0156667	0.0256667	0.361	0.0196667	0.245333	0.0323333	0	0	0	0	0	0.00233333	0.322333	0.680333	0.0143333	0	0.00466667	0.00233333	0	0	0.009
Miscellaneous	Glucose-1-Phosphate	0.005	0.0103333	0.0253333	0.0306667	0.023	0.0143333	0.023	0.033	0.016	0.024	0.004	0.00966667	0.021	0.005	0	0.0116667	0.0233333	0.0196667	0.00633333	0.00433333	0.018	0	0.017	0	0.006	0.00266667	0.00966667	0.00966667	0.0323333	0.0146667	0.0486667	0.0183333	0.0366667	0.00166667	0	0	0	0.00466667	0.0286667	0.0303333	0	0.00833333	0.0293333	0.00766667	0	0	0	0.013
Miscellaneous	D,L-α-Glycerol Phosphate	-0.000333333	-0.000333333	0	0	0	0.004	0.041	0	0.00166667	0	0.00466667	0.00666667	-0.001	0	0	0.000333333	0	0.000333333	0.00133333	0.00166667	-0.000333333	0	0.00133333	0	0.000333333	0	0.001	0.00133333	0.00166667	0.00266667	0.00766667	0.002	0.0373333	0	0	0.002	0	0	0.0196667	0.046	0	0.00333333	0.0256667	0.015	0.00966667	0	0	0.00433333
Carboxylic acid	D-Galactonic Acid γ-Lactone	-0.000333333	0.000333333	-0.000333333	0.000666667	-0.000333333	0	0.00766667	0	0.00166667	-0.000333333	0.00166667	0.00233333	-0.000666667	0	0	0	0.00166667	0.001	0	0.001	0.000333333	0	0.001	0	0	0.000333333	0.001	0.00166667	0.00166667	0.00133333	0.00333333	0.002	0.00233333	0.00266667	0.061	0	0.022	0.0393333	0.00633333	0	0	0	0	0	0.0113333	0	0	0.00166667
Carboxylic acid	D-Galacturonic Acid	0.0363333	0.00433333	0.179667	0.015	0.315	0.314333	0.404	0.0216667	0.006	0.147333	0.305333	0.007	0.00433333	0.002	0	0.140333	0.142	0.017	0.00166667	0.004	0.0133333	0	0.0136667	0.00266667	0.00333333	0.005	0.12	0.0656667	0.0203333	0.254667	0.0556667	0.229667	0.0106667	0	0	0.004	0	0	0.0556667	0.395667	0.557	0.0253333	0	0.003	0.343667	0.167	0	0.00466667
Carboxylic acid	2-Hydroxy Benzoic Acid	0.0426667	0.00966667	0.0833333	0.0206667	0.0253333	0.0103333	0.00566667	0.029	0.008	0.0263333	0.006	0.0113333	0.014	0.003	0	0.008	0.0466667	0.0216667	0.002	0.005	0.018	0	0.0186667	0.0366667	0	0.00766667	0.00866667	0.00566667	0.0186667	0.016	0.0296667	0.0203333	0	0.00266667	0	0	0	0	0	0	0	0.00366667	0	0.00866667	0.215667	0	0	0.00433333
Carboxylic acid	4-Hydroxy Benzoic Acid	0.00533333	0.0153333	0.153333	0.0256667	0.0266667	0.0156667	0.0276667	0.04	0.00966667	0.0293333	0.00966667	0.00866667	0.0193333	0.00266667	0	0.0183333	0.202	0.03	0.001	0.007	0.0166667	0	0.022	0.0213333	0	0.00433333	0.009	0.00833333	0.0233333	0.02	0.012	0.0203333	-0.000333333	0	0	0	0	0	0.00166667	0	0	0.002	0	0.008	0.245	0	0	0.0643333
Carboxylic acid	γ-Amino Butyric Acid	0.0326667	0.031	0.056	0.031	0.343333	0.269667	0.369667	0.0393333	0.0193333	0.0623333	0.0796667	0.015	0.0253333	0.003	0.001	0.189333	0.0713333	0.0256667	0.00766667	0.00733333	0.0243333	0	0.0266667	0	0	0.009	0.155	0.237333	0.0353333	0.318	0.464667	0.195667	0.03	0.012	0	0	0	0	0.004	0.318333	0.565	0.0263333	0.194	0.0193333	0.0953333	0.251	0	0.0186667
Carboxylic acid	Itaconic Acid	0.00766667	0.0193333	0.0173333	0.029	0.0246667	0.0206667	0.0103333	0.0366667	0.026	0.029	0.009	0.0163333	0.0233333	0.008	0	0.0156667	0.0196667	0.023	0.00333333	0.006	0.019	0	0.0216667	0	0.009	0.00633333	0.0166667	0.009	0.0303333	0.026	0.027	0.0206667	0	0.003	0	0	0	0	0.0116667	0	0	0.0243333	0	0.0116667	0	0	0	0.0113333
Carboxylic acid	α-Keto Butyric Acid	0.005	0.0113333	0.0126667	0.0316667	0.00266667	0.0123333	0.009	0.0323333	0.015	0.0203333	0.007	0.0113333	0.00933333	0.00333333	0	0.0116667	0.0173333	0.018	0.004	0.003	0.0146667	0	0.0176667	0	0.00433333	0.00166667	0.00866667	0.00266667	0.0223333	0.0116667	0.017	0.0143333	0.016	0	0	0	0	0	0.009	0.0153333	0	0.0123333	0.00366667	0.0156667	0	0	0	0.008
Carboxylic acid	D-Malic Acid	0.000333333	0	0.006	0.00233333	0	0.000333333	0.0833333	0.00466667	0.001	0	0.014	0.00633333	-0.000333333	0.00833333	0	0.00533333	0.01	0.002	0.00433333	0.001	0.002	0	0.00233333	0	0	-0.000333333	0.000666667	0.001	0.00133333	0.000666667	0.008	0.00833333	0.0153333	0	0	0.00166667	0.0156667	0.05	0.029	0.009	0	0.009	0.0456667	0.0176667	0.0276667	0	0	0.002
Amino acid	L-Arginine	0.00166667	0.00166667	0.00133333	0.00133333	0.00266667	0.000333333	0.0166667	0.000333333	0.00133333	0.00166667	0.004	0.003	0.00666667	0	0.00633333	0	0.00266667	0.00166667	0.00333333	0.001	-0.000333333	0	0.001	0	0	0	0.001	0.002	0.006	0.004	0.097	0.00466667	0	0.0106667	0.098	0.001	0.037	0.194667	0.0213333	0.0293333	0.0243333	0.00666667	0	0.008	0.0346667	0.0113333	0	0.0153333
Amino acid	L-Asparagine	0.0563333	0.004	0.0726667	0.009	0.293	0.312667	0.118	0.0166667	0.004	0.016	0.012	0.007	0.00566667	0	0.195333	0.110333	0.096	0.012	0.003	0.00566667	0.0113333	0	0.01	0	0	0.00366667	0.201	0.0283333	0.00766667	0.286333	0.0113333	0.0263333	0.00766667	-0.000333333	0	0	0.0146667	0.0203333	0	0.0203333	0.61	0.002	0.092	0.0133333	0.264667	0.286667	0	0.00666667
Amino acid	L-Phenylalanine	0	0.00766667	0.00866667	0.0153333	0.0136667	0.00533333	0.0236667	0.0226667	0.00766667	0.0156667	0.00933333	0.0113333	0.0163333	0.000666667	0	0.005	0.0103333	0.0186667	0.00566667	0.00566667	0.013	0	0.0156667	0	0	0.00266667	0.006	0.008	0.0153333	0.0156667	0.001	0.0153333	0	0	0	0	0.0133333	0	0	0	0	0.009	0	0.00966667	0	0	0	0.00433333
Amino acid	L-Serine	0.00366667	0.0163333	0.0136667	0.0233333	0.211333	0.00866667	0.057	0.0253333	0.0123333	0.025	0.016	0.0106667	0.013	0	0.19	0.00666667	0.0163333	0.023	0	0.00466667	0.0133333	0	0.0166667	0	0	0.00366667	0.00733333	0.0126667	0.021	0.138	0.0946667	0.0126667	0.000666667	0	0	0	0	0	0	0	0.438667	0.00233333	0	0.0416667	0	0	0	0.00433333
Amino acid	L-Threonine	0.00933333	0.0196667	0.023	0.0256667	0.0246667	0.019	0.062	0.0313333	0.014	0.024	0.0133333	0.0193333	0.008	0.002	0.000666667	0.017	0.01	0.0186667	0.00466667	0.00766667	0.016	0	0.0193333	0	0.00133333	0.0123333	0.014	0.0143333	0.028	0.0206667	0.014	0.023	-0.000333333	0.00533333	0.157	0	0	0	0.00566667	0	0	0.0283333	0	0.0293333	0	0	0	0.0123333
Amino acid	Glycyl-L-Glutamic Acid	0.00433333	0.0153333	0.0176667	0.025	0.0303333	0.015	0.0526667	0.0276667	0.0176667	0.0256667	0.0156667	0.0166667	0.011	0.0113333	0.00133333	0.0213333	0.0193333	0.019	0.003	0.00966667	0.016	0	0.0163333	0	0.00366667	0.00366667	0.011	0.0133333	0.0213333	0.0286667	0.0373333	0.0166667	0.012	0	0.274	0	0	0	0.0103333	0	0	0.031	0	0.025	0	0	0	0.00633333
Amine/Amide	Phenylethyl-amine	0.003	0.0103333	0.02	0.0226667	0.00833333	0.00933333	0.0173333	0.0253333	0.0146667	0.0153333	0.00866667	0.0133333	0.02	0.024	0.0136667	0.0193333	0.0256667	0.0213333	0.003	0.00466667	0.0123333	0	0.016	0	-0.000333333	0.00666667	0.00966667	0.00666667	0.0156667	0.00866667	0.0223333	0.014	0.003	0.0103333	0	0	0	0.031	0.0183333	0.0796667	0	0.017	0.0416667	0.016	0.022	0	0	0.0136667
Amine/Amide	Putrescine	0.00166667	0.000333333	0.00466667	0.00366667	0.0636667	0.00633333	0.0673333	0.00166667	0.00133333	0.000666667	0.006	0.00266667	0.001	0.005	0	0.024	0.00666667	0.002	0.001	0.00133333	0.00466667	0	0.00233333	0	0	0.001	0.00466667	0.00533333	0.00233333	0.0146667	0.0563333	0.003	0.0286667	0	0	0.0333333	0	0.0136667	0.03	0.055	0.431	0.00666667	0.0353333	0.0253333	0.011	0	0	0.003
[truncated: 4 more columns]

## Sheet: Day 7
Supplementary Table S2. Average optical density (OD 590nm) of Biolog EcoPlates (n=3) measured after 7 days of incubation at 25°C.
Class	Compound	F52	F53	F57	F63	F66	F73	F75	F79	F86	F129	F130	F136	F145	F146	F159	F160	F174	F179	F181	F182	F185	F188	F224	F225	F253	F280	F294	F297	F298	F300	F301	F303	F311	F312	F313	F314	F318	F326	F327	F331	F345	F346	F347	F355	F359	F376	F378	F382
Miscellaneous	Pyruvic acid methyl ester	0	0.00666667	0.135	0.0216667	0.489333	0.144	0.304333	0.0376667	0.00566667	0.00966667	0.291333	0.00233333	0.001	0.000333333	0	0	0.102	0.000666667	0.002	0.00166667	0.00433333	0.00633333	0.00433333	0.0473333	0.0253333	0.007	0.00933333	0.437	0.008	0.526667	0.125	0.041	0.005	0.0166667	0	0	0.00333333	0	0	0.036	0.869333	0	0.302333	0.0153333	0.172	0.0126667	0.0293333	0
Polymer	Tween 40	0.0543333	0.0526667	0.388	0.049	0.063	0.901333	0.501	0.0443333	0.479333	0.0406667	0.716667	0.0116667	0.0126667	0.085	0.283667	0.433667	0.625667	0.547	0.0133333	0.00866667	0.0173333	0.0243333	0.0123333	0.215333	0.0726667	0.0103333	0.541333	0.006	0.0206667	0.0373333	0.100667	0.009	0.321333	0.006	0.0206667	0.317667	0.148	0.0276667	0.0233333	0.0513333	0.0523333	0.00433333	0.0113333	0.234	0.162333	0.541	0.0476667	0.011
Polymer	Tween 80	0	0.025	0.478	0.0286667	0.00233333	0.298333	0.194	0.0236667	0.0313333	0.05	0.469667	0.0106667	-0.00266667	0.015	0.195667	0.361667	0.359667	0.195	0.008	0.0106667	0.00866667	0.0176667	0.0153333	0.346667	0.076	0.0156667	0.0906667	0.0983333	0.245333	0.109333	0.533	0.127333	0.0966667	0	0	0.0313333	0.183333	0	0.019	0	0.039	0	0.084	0.180667	0.118	0.241667	0.0336667	0
Polymer	α-Cyclodextrin	0	0.0306667	0.0366667	0.0376667	0.0273333	0.032	0.037	0.0423333	0.0346667	0.0243333	0.0133333	0.0126667	0.00466667	0.0173333	0.005	0.0223333	0.0283333	0.0193333	0.009	0.0133333	0.009	0.0173333	0.012	0.025	0.0496667	0.021	0.0326667	0.0273333	0.021	0.0223333	0.0563333	0.0186667	0.062	0.0273333	0	0.0286667	0	0	0.0223333	0.0206667	0.05	0.035	0.171667	0.00866667	0	0.104	0.048	0.0136667
Polymer	Glycogen	0	0.025	0.658	0.0373333	0.027	0.0126667	0.0593333	0.019	0.0333333	0.0316667	0.0396667	0.0143333	0.005	0.016	0	0.0136667	0.488333	0.0173333	0.014	0.0233333	0.0153333	0.0226667	0.018	0	0.036	0.0153333	0.0193333	0.022	0.013	0.025	0.0256667	0.0303333	0.0443333	0.059	0	0.0113333	0	0	0	0	0.052	0.00933333	0	0	0.567667	0.0303333	0.00633333	0.00266667
Carbohydrate	D-Cellobiose	0.041	0.015	0.27	0.0306667	1.04667	0.420333	0.546667	0.0883333	0.0383333	0.551	0.591667	0.000333333	-0.00366667	0.0693333	0.659	0.492	0.171333	0.00866667	0.00433333	0.008	0.00666667	0.0113333	0.0113333	0.142667	0.220667	0.00833333	0.100333	1.1	0.399	0.955667	1.21567	0.623667	0.311333	0.0576667	0.00333333	0.189667	0.298667	0	0.371667	0.819333	1.22767	0.0126667	0.0996667	0.104667	0.0856667	0.263333	0.0453333	0.383333
Carbohydrate	α-D-Lactose	0	0.00133333	0.014	0.01	0.806333	0.017	0.303333	0.0113333	0.002	0.003	0.722333	0.00733333	0.00233333	0	-0.000333333	0.005	0.003	0.00333333	0.001	0.00266667	0.00166667	0.011	0.004	0.0236667	0.125	0.004	0.006	0.300333	0.00933333	0.892	0.139333	0.820333	0.365667	0	0	0.346	0	0	0.00133333	0.177667	1.05633	0.017	0	0	0	0.0463333	0.0386667	0.047
Carbohydrate	β-Methyl-D-Glucoside	0.0326667	0.00466667	0.248667	0.003	0.846333	0.143333	0.701	0.00133333	0.003	0.562	0.603667	0	0.000666667	0.0106667	0.787333	0.0266667	0.0286667	0.00266667	0	0.00233333	0.00233333	0	0.003	0.0136667	0.148333	0.00333333	0.096	0.00833333	0.00433333	0.816	0.0343333	0.691333	0.441667	0.000333333	0.379667	0.862333	0.157	0.447	0.028	0.909	0.905333	0.0103333	0.0616667	0.0343333	0.76	0.477333	0.234333	0.0746667
Carbohydrate	D-Xylose	0.305333	0.029	0.366	0.043	0.57	0.613667	0.418667	0.086	0.0323333	0.326	0.665333	0.0566667	0.0523333	0.0376667	0.0783333	0.405667	0.147	0.0256667	0.0216667	0.0266667	0.024	0.067	0.0253333	0.576333	0.268667	0.0303333	0.691333	0.750333	0.0603333	0.544667	1.21567	0.538333	0.392333	0.0196667	0	0.0916667	0.067	0.647667	1.36433	0.751667	0.803	0.0403333	0.593333	0.950667	0.629667	0.413667	0.707333	0.411333
Carbohydrate	i-Erythritol	0	0.0133333	0.456333	0.032	0.727667	0	0.487667	0.0143333	0.0223333	0.284667	0.467667	0	0.000666667	0.0173333	0	0.0193333	0.140333	0.006	0.004	0.00733333	0.00233333	0.015	0.00833333	0	0.0336667	0.00833333	0.00733333	0.01	0.005	0.623667	0.0643333	0.339	0.028	0.00666667	0	0	0	0	0.00633333	0.486333	0.954333	0	0.0366667	0.0176667	0.668667	0.00733333	0.0553333	0
Carbohydrate	D-Mannitol	0	0.0123333	0.451333	0.0286667	1.03933	0.666333	0.800667	0.09	0.0453333	0.465333	0.459333	0	-0.002	0.015	0.740667	0.721667	0.575333	0.0143333	0.003	0.00833333	0.00333333	0.013	0.0103333	0.531333	0.0423333	0.00733333	0.323667	0.880333	0.213333	0.99	1.42967	0.186333	0.361333	0.022	0	0	0.358	0	1.16867	0.129	1.297	0	1.01467	0.849333	0.396667	0.662667	0.0823333	0.00666667
Carbohydrate	N-Acetyl-D-Glucosamine	0.246667	0.0266667	0.195	0.046	0.574333	0.658333	0.423667	0.07	0.04	0.24	0.455333	0.023	0.001	0.00966667	1.388	0.483	0.237	0.0146667	0.005	0.014	0.006	0.018	0.019	0	0.0553333	0.0176667	0.504667	0.0236667	0.0166667	0.555667	0.0476667	0.361333	0.167	0.036	0	0.0243333	0.555333	0	0	0.506333	0.912	0.011	0	0	0.561333	0.128667	0.055	0.00566667
Carboxylic acid	D-Glucosaminic-Acid	0	0.0173333	0.0293333	0.0396667	0.636667	0.0183333	0.383	0.0323333	0.034	0.067	0.459667	0.008	-0.00166667	0.00733333	0.00233333	0.018	0.006	0.013	0.0126667	0.0136667	0.00833333	0.019	0.014	0.0743333	0.0426667	0.00933333	0.0176667	0.017	0.009	0.526333	0.0303333	0.438	0.0426667	0.0546667	0	0.00733333	0	0	0	0.521	0.963333	0.00766667	0	0	0	0	0.0143333	0
Miscellaneous	Glucose-1-Phosphate	0	0.011	0.0476667	0.0353333	0.0266667	0.009	0	0.0136667	0.024	0.0116667	0.00433333	0.004	-0.003	0.001	0	0.00266667	0.016	0.009	0.00866667	0.008	0.007	0.0133333	0.00933333	0	0.0306667	0.006	0.011	0.0103333	0.0166667	-0.000333333	0.059	0.00166667	0.0203333	0.0296667	0	0.00266667	0	0.0106667	0	0.0416667	0.0563333	0.00333333	0	0	0	0.0123333	0.002	0
Miscellaneous	D,L-α-Glycerol Phosphate	0	0	0.00433333	0.00566667	0.001	0.0103333	0.0163333	-0.000333333	0.001	-0.000333333	0.019	0	-0.000333333	0.001	0	-0.000333333	0	0.000333333	0.00266667	0.00166667	0.001	0.00333333	0.00266667	0	0.013	0.001	0.00133333	0.00166667	0.000666667	0	0.0106667	0	0.0273333	0	0	0.00566667	0	0.00833333	0	0.0403333	0	0	0.0106667	0.000666667	0	0.0146667	0.002	0.004
Carboxylic acid	D-Galactonic Acid γ-Lactone	0	0.001	0.000333333	-0.000333333	0	0	0	0	0.00133333	-0.000333333	0.001	0	-0.00366667	0	0	0	0	0	0	0.00166667	0.000666667	0	0.001	0	-0.000333333	0.00166667	0	0.00133333	0.00133333	0	-0.000333333	0.002	0	0.018	0	0	0	0.039	0	0	0	0	0.000333333	0	0	0.00333333	0.0386667	0
Carboxylic acid	D-Galacturonic Acid	0.418	0.00333333	0.355667	0.0343333	0.571667	0.524333	0.563667	0.095	0.0116667	0.245333	0.53	0.00133333	0.000333333	0.002	0	0.379	0.342	0.00433333	0.00233333	0.00333333	0.00233333	0.00766667	0.00466667	0	0.0426667	0.0113333	0.362333	0.266333	0.0606667	0.476667	0.215	0.396667	0.0523333	0.042	0	0.001	0	0	0.133333	0.473667	0.836	-0.000333333	0.360667	0.0523333	0.436	0.188333	0.0933333	0.00466667
Carboxylic acid	2-Hydroxy Benzoic Acid	0	0.008	0.160333	0.0276667	0.022	0.002	0	0.0116667	0.0203333	0.01	0.00966667	0.00566667	-0.002	0	0	0.001	0.053	0.006	0.00466667	0.00733333	0.00366667	0.012	0.008	0.0826667	0.0336667	0.00933333	0.00733333	0.005	0.00233333	0	0.0323333	0.00133333	0.0193333	0	0	0	0	0.00466667	0	0	0.0463333	0.00133333	0	0	0.229667	0	0.0333333	0
Carboxylic acid	4-Hydroxy Benzoic Acid	0	0.0143333	0.245667	0.055	0.021	0.0263333	0.013	0.0183333	0.0253333	0.0116667	0.0146667	0.000333333	0.000333333	0.009	0	0.006	0.289333	0.0286667	0.006	0.013	0.004	0.0163333	0.0113333	0.0306667	0.0343333	0.00966667	0.006	0.00966667	0.004	-0.000333333	0.0273333	-0.000333333	0.0423333	0	0	0	0	0	0	0	0.04	0.00266667	0.0146667	0	0.279333	-0.000333333	0.231667	0.187333
Carboxylic acid	γ-Amino Butyric Acid	0	0.0306667	0.120333	0.0336667	0.544333	0.384667	0.390667	0.0986667	0.034	0.069	0.400333	0.00833333	-0.000666667	0.00633333	0.004	0.357	0.127333	0.0193333	0.0126667	0.0143333	0.0116667	0.0193333	0.0153333	0	0.041	0.0113333	0.258667	0.47	0.0276667	0.470333	0.721	0.237333	0.104667	0.0423333	0	0	0	0	0	0.352667	0.878667	0.016	0.520667	0.168333	0.0896667	0.213333	0.0436667	0.003
Carboxylic acid	Itaconic Acid	0	0.0223333	0.0373333	0.032	0.021	0.00666667	0.00933333	0.0186667	0.036	0.0126667	0.0153333	0.008	-0.00133333	0.0116667	0	0.011	0.00933333	0.019	0.00866667	0.015	0.00833333	0.0173333	0.0123333	0	0.0503333	0.0113333	0.0183333	0.0136667	0.0136667	0.0106667	0.0336667	0.004	0.0416667	0.0426667	0	0.005	0	0	0	0	0.058	0.009	0	0	0	0	0.00333333	0
Carboxylic acid	α-Keto Butyric Acid	0	0.014	0.0273333	0.038	-0.000333333	0.00466667	0	0.0126667	0.023	0.00833333	0.005	0.00333333	-0.00433333	0.000333333	0	0.00366667	0.007	0.006	0.006	0.00666667	0.00833333	0.009	0.00933333	0	0.0246667	0.00733333	0.0113333	0.00366667	0.003	0	0.025	0.000333333	0.0153333	0.0543333	0	0.00366667	0	0	0	0.03	0.0506667	0.00633333	0	0	0	0.00633333	0.008	0
Carboxylic acid	D-Malic Acid	0	0	0.0356667	0.00833333	0	0.0146667	0.187	0.00433333	0.00133333	0.000333333	0.127667	0.0136667	0.00433333	0.007	0	0	0.035	0.00166667	0.00766667	0.00233333	0.002	0.00266667	0.00333333	0	0.01	0.00233333	0.00266667	0.00133333	0.000666667	0	0.009	0.001	0.021	0	0.005	0.032	0	0.038	-0.000333333	0.01	0	0.00366667	0.043	0	0.00366667	0.007	0.03	0.00133333
Amino acid	L-Arginine	0	0.00433333	0.00233333	0.00533333	0.018	0.0123333	0	0.008	0.00133333	0.00133333	0.00333333	0.0106667	-0.00166667	0	0.004	-0.000333333	0.00133333	0.00366667	0.004	0.001	0	0	0.000666667	0	0.000333333	0.000666667	0.00166667	0.00166667	0.00533333	0	0.0376667	0.003	0.00533333	0.031	0	0	0.00966667	0.0136667	0	0.015	0.0323333	0.0223333	0.0216667	0	0	0.019	0.029	0
Amino acid	L-Asparagine	0.264333	0.005	0.197667	0.0186667	0.463667	0.495667	0.311	0.220333	0.007	0.017	0.117333	0.00133333	-0.000666667	0.002	0.281	0.321667	0.214	0.00166667	0.002	0.00533333	0.00133333	0.011	0.003	0	0.023	0.002	0.443667	0.316333	0.00233333	0.432667	0.307	0.009	0.192333	0.018	0	0.009	0	0.0296667	0.008	0.0263333	0.796333	0	0.554667	0.160333	0.376	0.398667	0.0466667	0
Amino acid	L-Phenylalanine	0	0.00833333	0.0206667	0.0196667	0.0123333	0.002	0	0.0103333	0.017	0.00666667	0.0263333	0.002	-0.001	0.00433333	0	0	0.008	0.00533333	0.005	0.009	0.00266667	0.0146667	0.00733333	0	0.0283333	0.00266667	0.00466667	0.00433333	0.00266667	0	0.015	0	0.0353333	0	0	0	0	0.014	0	0	0	0.00533333	0	0	0	0.000333333	0.0243333	0
Amino acid	L-Serine	0	0.0176667	0.0326667	0.0253333	0.448667	0.0243333	0.0346667	0.0123333	0.03	0.019	0.0386667	0.00433333	-0.00433333	0.002	0.305667	0.00333333	0.0133333	0.0136667	0.00566667	0.00866667	0.00133333	0.0136667	0.00866667	0	0.041	0.005	0.01	0.109	0.00533333	0.319667	0.304333	0	0.0353333	0	0	0	0.0116667	0	0	0	0.683	0.007	0.24	0.00566667	0	0.000333333	0.0326667	0
Amino acid	L-Threonine	0	0.0246667	0.0333333	0.0276667	0.0226667	0.0103333	0.0163333	0.018	0.0283333	0.0153333	0.00466667	0.021	-0.00333333	0.00766667	0	0.008	0.00266667	0.0113333	0.0103333	0.0143333	0.00566667	0.0176667	0.0106667	0	0.0326667	0.0116667	0.0143333	0.0203333	0.0126667	0.003	0.08	0.00633333	0.031	0.011	0	0.00733333	0	0	0	0	0.0306667	0.016	0.01	0	0	0	0.022	0.00166667
Amino acid	Glycyl-L-Glutamic Acid	0	0.0203333	0.0303333	0.035	0.0443333	0.016	0.028	0.0356667	0.0273333	0.015	0.00633333	0.00766667	0.000333333	0.0133333	0	0.00933333	0.013	0.015	0.00966667	0.017	0.00766667	0.022	0.009	0	0.0293333	0.007	0.0126667	0.0166667	0.00933333	0.00933333	0.0546667	0	0.0553333	0.0576667	0	0.0113333	0.000666667	0	0	0	0.0256667	0.0113333	0.0196667	0.00666667	0	0.00333333	0.00666667	0.00666667
Amine/Amide	Phenylethyl-amine	0	0.0173333	0.0446667	0.0303333	0.00866667	0.00366667	0.0106667	0.0133333	0.0256667	0.00733333	0.003	0.00466667	-0.003	0.024	0	0.011	0.0363333	0.011	0.00933333	0.01	0.00666667	0.0173333	0.00933333	0	0.0333333	0.00966667	0.0133333	0.006	0.00333333	0	0.0456667	0.00133333	0.028	0.0526667	0	0.008	0	0.00966667	0	0.106667	0.0373333	0.008	0.00933333	0.00266667	0	0	0	0
Amine/Amide	Putrescine	0	0.013	0.015	0.014	0.144667	0.254	0.0286667	0.116333	0.00666667	0.00433333	0.115333	0.018	0.001	0.00533333	0	0.0306667	0.009	0.00333333	0.002	0.00333333	0.00166667	-0.000333333	0.00433333	0	0.012	0.002	0.150333	0.0416667	0.00933333	0.03	0.136333	0.00666667	0.038	0	0	0.0303333	0	0.0186667	0	0.051	0.256667	0.00266667	0.00633333	0.0136667	0	0.00633333	0.0256667	0
[truncated: 4 more columns]

## Sheet: Day 10
Supplementary Table S2. Average optical density (OD 590nm) of Biolog EcoPlates (n=3) measured after 10 days of incubation at 25°C.
Class	Compound	F52	F53	F57	F63	F66	F73	F75	F79	F86	F129	F130	F136	F145	F146	F159	F160	F174	F179	F181	F182	F185	F188	F224	F225	F253	F280	F294	F297	F298	F300	F301	F303	F311	F312	F313	F314	F318	F326	F327	F331	F345	F346	F347	F355	F359	F376	F378	F382
Miscellaneous	Pyruvic acid methyl ester	0.0136667	0.00266667	0.184333	0.0106667	0.524667	0.105	0.241333	0.033	0.00133333	0.008	0.081	0	-0.002	0.00833333	-0.000333333	0	0.144	0.00133333	0.002	0.00433333	0.002	0	0.00333333	0.064	0.000333333	0.003	0.00133333	0.682667	-0.000333333	0.551667	0.466	0.0943333	0	0.000666667	0	0.088	0.033	0	0.291333	0.249	0.9	0	0.511333	0.0153333	0.239667	0	0	0.00333333
Polymer	Tween 40	0.111667	0.0323333	0.552667	0.004	0.413	0.938333	0.486333	0.242667	0.681333	0.229667	0.764667	0	0.041	0.288667	0.365	0.665	0.706667	0.650333	0.008	0.00233333	0.00466667	0.0166667	0.00366667	0.540333	0.452333	0.014	0.625	0.0426667	0.105333	0.227333	0.315	0.250333	0.670667	0.0366667	0.576333	0.511	0.288667	0	0.201667	0.252	0.716	0	0	0.399333	0.231	0.813667	0	0.180667
Polymer	Tween 80	0.00233333	0.0103333	0.575	0.025	0.00166667	0.594	0.226	0.145667	0.011	0.047	0.0796667	0	0.00266667	0.0153333	0.273667	0.348333	0.654333	0.273	0.00766667	0.00666667	0.00633333	0.00933333	0.00433333	0.573333	0.133	0.0266667	0.284333	0.466667	0.474	0.28	0.778	0.047	0.084	0.000666667	0.189	0.204333	0.53	0	0.695333	0.0323333	0.0536667	0	0.103	0.0716667	0	0.301333	0	0.0293333
Polymer	α-Cyclodextrin	0.00333333	0.0193333	0.0176667	0.00833333	0.0186667	0.0376667	0.00733333	0.00966667	0.0173333	0.018	0.0593333	0.00433333	0.025	0.0396667	0.002	0.0143333	0.0183333	0.031	0.00366667	0.00633333	0.005	0	0.00533333	0.0113333	0.0126667	0.0156667	0.0186667	0.021	0.0223333	0.00833333	0.0703333	0.0136667	0.0866667	0.0103333	0	0.00933333	0	0	0.011	0	0.038	0.00433333	0.222333	0	0	0.0973333	0	0
Polymer	Glycogen	0	0.00566667	0.724	0.002	0.006	0.0113333	0.0196667	0.00333333	0.0116667	0.0163333	0.0873333	-0.000333333	0.0126667	0.0236667	0	0.01	0.693667	0.00833333	0.007	0.00866667	0.0116667	0.00133333	0.0103333	0	0	0.005	0	0.011	0.00133333	0.00366667	0.0596667	0.0376667	0.00933333	0.00566667	0	0	0	0	0	0	0	0	0	0	0.715	0	0	0.0276667
Carbohydrate	D-Cellobiose	0.26	0.00333333	0.34	0	1.097	0.588667	0.741667	0.170667	0.0136667	0.724	0.382333	0	0.00533333	0.105333	0.743	0.460333	0.358333	0	0.000666667	0.00433333	0.001	0	0.00266667	0.168333	0.399	0.000666667	0.157667	1.35267	0.751	1.11167	1.52533	0.714667	0.603	0.00766667	0.107667	0.534	0.335667	0	0.686	0.906333	1.391	0	0.316333	0.105	0.23	0.202667	0.0723333	0.615333
Carbohydrate	α-D-Lactose	0	0.00366667	0.00633333	0	0.712667	0.0396667	0.777333	0.007	0.003	0.003	0.394667	0.009	-0.000333333	0.0106667	0	-0.000333333	0.007	0.000333333	-0.000333333	0.0126667	0.001	0.00966667	0.00166667	0.0383333	0.434667	0	0	0.631667	0.0153333	0.897	0.257	0.951333	0.392667	0.00766667	0.0443333	0.719	0.00366667	0.150667	0	0.437333	1.138	0	0	0	0	0	0	0.02
Carbohydrate	β-Methyl-D-Glucoside	0.0923333	0.00633333	0.237333	0.00166667	0.807	0.286333	0.862	0.0106667	0.004	0.756667	0.280667	0.0336667	0.003	0.0286667	0.816	0.0506667	0.0646667	0.00133333	0.00133333	0.004	0.002	0	0.00266667	0.0906667	0.396333	0.024	0.0736667	0.008	-0.000333333	0.855333	0.174333	0.777667	0.618	0	0.698333	0.868667	0.219	0.538	0.0536667	0.814	0.952667	0	0.105333	0.0963333	0.703333	0.515667	0.154333	0.088
Carbohydrate	D-Xylose	0.365667	0.0226667	0.399667	0.0233333	0.699333	0.922	0.607	0.215	0.0273333	0.495	0.932667	0.120667	0.0476667	0.0233333	0.108333	0.572667	0.182333	0.025	0.0216667	0.0253333	0.0226667	0.045	0.0213333	0.686	0.359667	0.024	0.953667	1.035	0.046	0.646667	1.60333	0.744667	0.513667	0.036	0.0513333	0.318	0.093	0.640333	1.81133	0.881667	0.933	0.035	0.985	1.376	0.829667	0.616	0.877	0.566667
Carbohydrate	i-Erythritol	0	0	0.508333	0	0.936667	0.0153333	0.712667	0	0.003	0.336	0.833667	0	0.00133333	0.0426667	0.016	0.016	0.298	0.002	0.00166667	0.002	0	0	0.000333333	0	0	0	0	0.0816667	0	0.822667	0.071	0.522333	0	0.00333333	0	0.239	0.000333333	0	0.0263333	0.639667	1.188	0	0.039	0.0286667	0.754667	0	0	0
Carbohydrate	D-Mannitol	0.0126667	0.000333333	0.596333	-0.000333333	1.267	0.838	0.868333	0.208333	0.0546667	0.676667	0.775	0	0.00233333	0.231333	0.933	0.951	0.749333	0.011	0.001	0.01	0.002	0	0.00266667	0.605667	0.364	0.071	0.297	1.17633	0.577667	1.21	1.73233	0.357667	0.736	0.00733333	0.352333	0.181667	0.495667	0.263	1.59533	0.225333	1.62067	0	1.34567	1.10333	0.542333	0.811333	0.0613333	0.032
Carbohydrate	N-Acetyl-D-Glucosamine	0.615333	0.00666667	0.136	0.0343333	0.775333	1.069	0.604	0.224667	0.0126667	0.336333	0.665333	0.106	0.008	0.00366667	1.55033	0.572	0.339333	0.00266667	0.002	0.002	0	0	0.00966667	0	0.118	0.006	0.784333	0.0133333	0.003	0.740333	0.003	0.474667	0.461667	0.000666667	0.103667	0.19	0.739667	0	0	0.449667	1.101	0	0	0	0.593333	0.181667	0	0
Carboxylic acid	D-Glucosaminic-Acid	0.00366667	0	0	0.000333333	0.756667	0.009	0.519	0.0136667	0.00633333	0.0566667	0.32	0	0.00433333	0	0	0.0206667	0	0	0.006	0.00166667	0.000666667	0	0.003	0.0463333	0.003	0	0	0.003	0	0.705667	0.00766667	0.569667	0	0	0	0	0	0	0	0.482	1.02	0	0	0	0	0	0	0
Miscellaneous	Glucose-1-Phosphate	0	0.000666667	0.007	0	0	0.000666667	0	0.000333333	0.00266667	0.000666667	0.049	0	0.00833333	0	0	0	0.00933333	0	0.00166667	0.00233333	0.000333333	0	0.001	0	-0.000333333	0	0	0	0	0	0.0646667	0	0	0.00933333	0	0	0	0	0	0	0	0	0.112667	0	0	0	0	0
Miscellaneous	D,L-α-Glycerol Phosphate	0	-0.000333333	0.00333333	0	0.016	0.0166667	0.0613333	-0.000333333	0.002	0	0.00166667	0	-0.000333333	0.0193333	0	0	0.001	0	0.000666667	0.002	0.000333333	0.002	0.00233333	0.00766667	0.0213333	0.006	0	0	0	0	0	0.00333333	0	-0.000333333	0	0.039	0	0	0.00633333	0	0	0	0	0.00833333	0	0	0	0
Carboxylic acid	D-Galactonic Acid γ-Lactone	0.0136667	0.00166667	0	0	0	0	0	0	0.001	0	-0.00366667	0	-0.00166667	0.0143333	0	0	0.000666667	0	0.001	0.003	0.00166667	0.000666667	0.001	0	0	0.000666667	0	0	0	0	0	0.00133333	0	0.00966667	0.0473333	0.00333333	0.0233333	0	0	0	0	0	0	0	0	0	0	0
Carboxylic acid	D-Galacturonic Acid	0.222	0.000666667	0.369667	0.0393333	0.786667	0.701	0.582333	0.171333	0.00266667	0.326	0.546667	0	0.002	0.0106667	0	0.469333	0.507333	0.00766667	0.00633333	0.00433333	0.00166667	0	0.003	0	0.214333	0.00333333	0.406667	0.587333	0.155333	0.661	0.516	0.476333	0.269333	0.00533333	0.144333	0.031	0.00266667	0.0123333	0.215333	0.491333	1.07633	0	0.563	0.0213333	0.488	0.186	0.055	0.128
Carboxylic acid	2-Hydroxy Benzoic Acid	0	0.002	0.149333	0.0456667	-0.000333333	0.003	0.00466667	0	0.00366667	0.000666667	0.04	0	0.00766667	0.000666667	0	0	0.051	0.00466667	0.00166667	0.00233333	0.001	0	0.001	0.046	0	0.00233333	0	0.00266667	0	0	0	0	0	0.007	0	0	0	0	0	0	0	0	0	0	0.237333	0	0	0
Carboxylic acid	4-Hydroxy Benzoic Acid	0	0.00466667	0.274	0.0353333	0.00266667	0.09	0	0.00233333	0.00433333	0.001	0.0636667	0	0.004	0	0	-0.000333333	0.336333	0.108	0.000666667	0.00233333	0	0	0.002	0.0193333	0	0	0	0	0	0	0	0	0	0.001	0	0	0	0	0	0	0.0226667	0	0	0	0.296667	0	0.127333	0.237667
Carboxylic acid	γ-Amino Butyric Acid	0.149333	0.0146667	0.0776667	0.003	0.585667	0.514667	0.387	0.185667	0.0103333	0.068	0.413	0	0.00466667	0.000666667	0	0.429	0.169333	0.0203333	0.007	0.00166667	0.00866667	0	0.006	0	0.0806667	0.00166667	0.297	0.720667	0.107	0.554	0.853333	0.397333	0.111333	0	0	0	0	0	0.0863333	0.341667	0.935667	0	0.832667	0.412333	0.204333	0.179333	0	0
Carboxylic acid	Itaconic Acid	0	-0.000333333	0	0	0	0.006	0	0	0.00633333	0.00133333	0.0573333	0	0.003	0	0	-0.000333333	0.00133333	0.00733333	0.00333333	0.00266667	-0.000333333	0	0.001	0	0.00566667	0	0	0	0	0	0	0	0	-0.000333333	0	0	0	0	0	0	0	0	0	0	0	0	0	0
Carboxylic acid	α-Keto Butyric Acid	0	0.00433333	0	0.003	0	0.002	0	0.00166667	0.00366667	0.000333333	0.0493333	0	0.00333333	0	0	0	-0.000333333	0	0.00266667	0.00266667	0.00133333	0	0.002	0	0	0	0	0	0	0	0	0	0	0.00233333	0	0	0	0	0	0	0	0	0.0416667	0	0	0	0	0
Carboxylic acid	D-Malic Acid	0	0.00133333	0.055	0	0.045	0.018	0.339333	0.001	0.00333333	0.001	0.017	0	0.00166667	0.0176667	0	0	0.0793333	0.00433333	0.00966667	0.00333333	0.001	0.001	0.00233333	0.000333333	0.0246667	0.00666667	0	0	0	0	0	0.00766667	0	0.003	0	0.0273333	0.015	0	0.0116667	0	0	0	0	0	0.11	0	0	0
Amino acid	L-Arginine	0	0.00366667	0.00966667	0.00466667	0	0.0316667	0	0.0156667	0.00133333	0.00233333	0.0286667	0	0.011	0	0.0133333	0.00566667	0.00333333	0.001	0.00466667	0.00233333	0.000333333	0	0.000333333	0	0.00866667	0	0.00766667	0	0.002	0	0.133667	0.00633333	0	0.003	0.0996667	0.015	0.0163333	0.149667	0.101	0	0.0316667	0.0143333	0.02	0.112	0	0.022	0	0
Amino acid	L-Asparagine	0.448667	0.000333333	0.215	0.00766667	0.577	0.670667	0.079	0.465333	0.00133333	0.022	0.115	0.00833333	0.0113333	0	0.296667	0.539667	0.259667	0.015	0.003	0.00333333	0.00166667	0	0.004	0.00733333	0.011	0.004	0.548	0.519667	0	0.555333	0.427333	0.248	0.378667	0.00533333	0.0993333	0.389667	0.023	0	0.305	0.125333	0.823667	0	0.678667	0.437333	0.370667	0.420333	0	0
Amino acid	L-Phenylalanine	0	0	0.000666667	-0.000333333	0	0.000333333	0	0	0.00233333	0	0.0416667	0	0.004	0	0	0	0.016	0.00833333	0.00333333	0.003	0	0.00233333	0.000333333	0	0.011	0	0	0	0	0	0	0	0	0	0	0	0.0116667	0	0	0	0	0	0	0	0	0	0	0
Amino acid	L-Serine	0.125667	0.00333333	0.0176667	0.00533333	0.392667	0.023	0.0236667	-0.000333333	0.01	0.011	0.0403333	0	0.00533333	0	0.36	0.0303333	0.018	0.0123333	0.001	0.00133333	0	0	0.000666667	0	0.00566667	0	0	0.312333	0	0.441667	0.376	0.00133333	0	0.000333333	0	0.0623333	0.0496667	0	0.100667	0	0.579667	0	0.354333	0.125	0	0	0	0
Amino acid	L-Threonine	0	0.00766667	0.007	0.003	0.004	0.018	0.017	0.00266667	0.00566667	0.005	0.035	0.0143333	0.004	0	0	0	0	0.006	0.003	0.00533333	0	0	0.00133333	0	0.01	0.00233333	0	0.0336667	0	0	0.0566667	0	0	0.005	0	0.117	0	0	0	0	0	0	0.000333333	0	0	0	0	0
Amino acid	Glycyl-L-Glutamic Acid	0	-0.000333333	0.00833333	0.00933333	0.0206667	0.014	0.00366667	0.0123333	0.002	0.00133333	0.0476667	0	0.00366667	0.007	0	0.00466667	0.00533333	0.00566667	0.00333333	0.00333333	0.000333333	0	0	0	0.024	0	0	0	0	0	0.046	0	0.00866667	-0.000333333	0.130667	0.00766667	0.00266667	0	0	0	0	0	0	0	0	0	0	0
Amine/Amide	Phenylethyl-amine	0	0.004	0.024	0.00533333	0	-0.000333333	0	0.000666667	0.004	0.001	0.039	0.00466667	0.00633333	0	0	0	0.033	0.000333333	0.002	0.005	0.000333333	0	0.000333333	0	0.0106667	0	0	0	0	0	0	0	0	0.004	0	0	0	0	0	0.078	0	0	0	0	0	0	0	0
Amine/Amide	Putrescine	0	0.003	0.016	0.00433333	0.0656667	0.425333	0.0553333	0.322	0.00266667	0.002	0.0213333	0	0.002	0.00866667	0	0.035	0.00933333	0	0.00433333	0.006	0	0.00166667	0.002	0	0.0153333	0	0.278667	0.153	0	0.009	0.0946667	0	0	0	0	0.0276667	0.00333333	0	0.006	0	0.0813333	0	0	0	0	0	0.007	0
[truncated: 4 more columns]
