# Supplementary material for: Genetic, Phenotypic and Metabolic Diversity of Yeasts From Wheat Flag Leaves
Source: Front Plant Sci. 2022 Jul 7;13:908628. doi: 10.3389/fpls.2022.908628 (PMC9301128; doi:10.3389/fpls.2022.908628)
Supplement: Supplementary file 4 [file Table_3.XLSX]

## Sheet: Sheet1
Supplementary Table S3. Average temperature growth range (OD600) of phyllosphere yeasts. Data represent the average of 3 replicates.
Isolate ID	4°C				10°C				25°C				37°C
	0	2 days	4 days	7 days	0	2 days	4 days	7 days	0	2 days	4 days	7 days	0	2 days	4 days	7 days
F52	0.01	0.00583333	0.0316667	1.02317	0.01	0.0196667	0.565333	1.17333	0.01	0.134571	0.901857	1.61057	0.01	9.52381e-05	-0.00690476	-0.00538095
F53	0.01	0.00283333	0.0163333	0.487167	0.01	0.0193333	0.134667	0.613	0.01	0.164571	0.588524	1.28324	0.01	0.00709524	-0.0052381	-0.00538095
F57	0.01	0.00416667	0.092	0.862833	0.01	0.0813333	0.844667	0.949333	0.01	0.676905	0.993524	1.0769	0.01	0.00342857	-0.00290476	-4.7619e-05
F63	0.01	0.0035	0.00266667	-0.0181667	0.01	0.00433333	0.0193333	0.686	0.01	0.0165714	0.0571905	0.709238	0.01	0.0017619	-0.00290476	-0.00204762
F66	0.01	0.0145	0.16	0.559167	0.01	-0.0953333	0.329667	0.676333	0.01	0.350571	1.04686	1.48957	0.01	-0.000571429	0.00109524	-4.7619e-05
F73	0.01	0.00616667	0.127667	0.9365	0.01	0.055	0.521	1.353	0.01	0.426238	1.26086	1.3179	0.01	-0.000238095	-0.0032381	-0.00271429
F75	0.01	0.0073	0.0536	0.614233	0.01	0.121667	0.451833	0.901233	0.01	0.556667	1.0934	1.0934	0.01	0.000866667	0.0065	0.0152333
F79	0.01	0.0005	0.00333333	0.1215	0.01	0.0103333	0.176333	0.774333	0.01	0.0932381	0.64419	1.2589	0.01	-0.0012381	0.0017619	0.00161905
F86	0.01	0.0015	0.0603333	0.318833	0.01	0.0403333	0.25	0.604667	0.01	0.116238	0.396857	0.882905	0.01	0.00109524	0.0234286	0.0169524
F129	0.01	0.0241667	0.286	0.660833	0.01	0.114333	0.668	0.915333	0.01	0.330571	0.974857	1.2569	0.01	0.00342857	0.0170952	0.0159524
F130	0.01	0.02	NA	0.49	0.01	0.11	NA	0.41	0.01	0.487333	1.43767	1.38233	0.01	0.0027619	-0.00357143	-0.00204762
F136	0.01	0.0188333	0.0876667	0.3265	0.01	0.05	0.233	0.560667	0.01	0.105905	0.49819	0.789571	0.01	0.0057619	0.00842857	0.00561905
F145	0.01	0.02	NA	0.14	0.01	0.05	NA	0.41	0.01	0.322571	0.513667	0.858333	0.01	0.0027619	-0.00357143	-0.00204762
F146	0.01	0.0033	0.0189333	0.272233	0.01	0.109667	0.1155	0.600567	0.01	0.355667	0.420067	0.420067	0.01	0.0152	0.0128333	0.0175667
F159	0.01	0.0125	0.270333	1.23817	0.01	0.301	1.23767	1.316	0.01	1.0609	1.28986	1.4239	0.01	0.0107619	0.0114286	0.00961905
F160	0.01	0.0181667	0.221	0.717833	0.01	0.106	0.659	0.876667	0.01	0.277238	0.900857	1.1029	0.01	0.0057619	0.0097619	0.000952381
F174	0.01	0.00883333	0.136667	1.4265	0.01	0.0883333	0.785333	1.27133	0.01	0.544238	0.86719	1.3499	0.01	0.000761905	-0.0082381	-0.00538095
F179	0.01	0.00783333	0.0756667	0.643167	0.01	0.0433333	0.204667	0.848	0.01	0.184238	1.05552	0.921905	0.01	-0.00157143	-0.0072381	-0.00538095
F181	0.01	0.0215	0.108667	0.507167	0.01	0.0543333	0.424333	0.689333	0.01	0.155238	0.419524	0.700905	0.01	0.0037619	-0.0052381	-0.00304762
F182	0.01	0.00783333	0.0656667	0.392833	0.01	0.0386667	0.329667	0.676333	0.01	0.254238	0.546524	0.782905	0.01	0.0027619	-0.00357143	-0.00204762
F185	0.01	0.0331667	0.148	0.4785	0.01	0.0853333	0.367667	0.936	0.01	0.160238	0.40819	1.16224	0.01	0.0017619	0.00342857	0.00561905
F188	0.01	0.00396667	0.0199333	0.3259	0.01	0.112667	0.106167	0.793233	0.01	0.38	0.103067	0.103067	0.01	0.00953333	0.0205	0.0175667
F224	0.01	0.0208333	0.133667	0.4505	0.01	0.102333	0.445	0.810667	0.01	0.571905	0.910857	1.12557	0.01	0.00542857	0.0017619	0.00528571
F225	0.01	0.00783333	0.0143333	0.0111667	0.01	0.019	0.0743333	0.248333	0.01	0.132238	1.11919	1.16624	0.01	0.00942857	0.0157619	0.013619
F253	0.01	0.0043	0.00993333	0.00923333	0.01	0.099	0.00316667	0.0425667	0.01	0.155667	0.0237333	0.312733	0.01	0.0158667	0.0275	0.0202333
F280	0.01	0.00383333	0.00633333	0.0165	0.01	0.007	0.0396667	0.302	0.01	0.0615714	0.303857	0.576905	0.01	0.00442857	0.0234286	0.0159524
F294	0.01	0.00283333	0.0826667	0.683833	0.01	0.0403333	0.662333	1.03067	0.01	0.544905	1.13819	1.26957	0.01	0.00309524	0.00342857	0.00228571
F297	0.01	0.0045	0.012	0.0655	0.01	0.017	0.299333	0.677667	0.01	0.322571	0.721524	1.07257	0.01	0.0037619	0.00542857	0.00428571
F298	0.01	0.0118333	0.032	0.145167	0.01	0.0273333	0.145667	0.479	0.01	0.189571	0.71919	1.04724	0.01	0.0097619	0.00542857	0.00495238
F300	0.01	0.0181667	0.183	0.626167	0.01	0.0923333	0.630667	0.978	0.01	0.568238	1.08386	1.28357	0.01	0.00242857	-0.00557143	-0.000714286
F301	0.01	0.0053	0.0496	0.472567	0.01	0.162667	0.5095	1.0099	0.01	1.082	0.665733	1.10607	0.01	0.0145333	0.0225	0.00956667
F303	0.01	0.0168333	0.145	0.844167	0.01	0.0546667	0.394667	0.897333	0.01	0.151238	0.41319	0.281238	0.01	0.0097619	-0.00357143	-0.00104762
F311	0.01	0.00196667	0.00593333	0.1429	0.01	0.102333	0.195167	0.664567	0.01	0.142667	0.481733	0.835733	0.01	0.0175333	0.0308333	0.0089
F312	0.01	0.00963333	0.104933	1.1709	0.01	0.151667	0.565167	1.14757	0.01	0.487333	0.4474	0.679067	0.01	0.0188667	0.0255	0.00923333
F313	0.01	0.000966667	0.00626667	0.149233	0.01	0.100667	0.1805	0.957233	0.01	0.207667	0.3874	0.536733	0.01	0.0262	0.0268333	0.0192333
F314	0.01	0.00763333	0.0759333	0.431233	0.01	0.123333	0.364833	0.682567	0.01	0.359	0.4224	0.964067	0.01	0.0128667	0.0181667	0.00856667
F318	0.01	0.00263333	0.0166	0.3469	0.01	0.117333	1.41383	1.8749	0.01	1.24167	1.58373	1.89673	0.01	0.0215333	0.0301667	0.0125667
F326	0.01	0.0033	0.0246	0.336233	0.01	0.111667	0.509833	0.9969	0.01	0.327333	0.3974	0.633067	0.01	0.0315333	0.0185	0.0145667
F327	0.01	0.00196667	0.0129333	0.0512333	0.01	0.106333	0.341167	1.1979	0.01	0.776	0.9504	1.1664	0.01	0.0418667	0.00383333	0.00456667
F331	0.01	0.00863333	0.0679333	0.3419	0.01	0.134	0.2055	0.454233	0.01	0.54	0.286067	0.606733	0.01	0.0148667	0.0095	0.00923333
F345	0.01	0.00663333	0.112267	0.779567	0.01	0.161333	0.718167	1.09957	0.01	1.201	0.974067	1.29273	0.01	0.0242	0.0265	0.0245667
F346	0.01	0.0259667	0.0586	0.6139	0.01	0.13	0.1775	0.571233	0.01	0.876	0.8554	1.76507	0.01	0.0275333	0.0331667	0.0139
F347	0.01	0.0073	0.0579333	0.623567	0.01	0.166	0.497833	0.858233	0.01	0.736667	0.7594	1.17807	0.01	0.0328667	0.0378333	0.0215667
F355	0.01	0.00463333	0.0316	0.1949	0.01	0.140333	0.513167	1.1799	0.01	0.718333	0.653067	1.1254	0.01	0.0265333	0.0305	0.0059
F359	0.01	0.0073	0.0672667	0.663567	0.01	0.171	0.968833	1.4089	0.01	0.872	0.924067	0.6594	0.01	0.0325333	0.0358333	0.0129
F376	0.01	0.00396667	0.0982667	0.9979	0.01	0.155	0.812833	1.21057	0.01	0.694333	0.840733	1.09807	0.01	0.0318667	0.0295	0.0059
F378	0.01	0.00496667	0.0176	0.190567	0.01	0.118667	0.1745	0.794233	0.01	0.537333	0.553733	0.750733	0.01	0.0282	0.0261667	0.0112333
F382	0.01	0.00663333	0.0492667	0.615233	0.01	0.137333	0.2915	0.911233	0.01	0.646667	0.6654	0.6654	0.01	0.0162	0.0301667	0.0125667
F383	0.01	0.00696667	0.0949333	0.570233	0.01	0.141333	0.789833	1.48823	0.01	0.754333	1.04707	1.44307	0.01	0.0338667	0.0361667	0.0049
F386	0.01	0.00263333	0.0189333	0.151233	0.01	0.116	0.529833	1.03723	0.01	0.950667	0.825067	1.0054	0.01	0.0485333	0.0215	0.0059
F391	0.01	0.0109667	0.00993333	0.0099	0.01	0.099	0.00416667	0.3589	0.01	0.412667	0.7294	0.7294	0.01	0.0698667	0.0085	0.0089
